# Supplementary material for: Modelling intracellular competition for calcium: kinetic and thermodynamic control of different molecular modes of signal decoding
Source: Springer Nature journal article supplement (doi:10.1038/srep23730), 2016-04-01
Supplement: 41598_2016_BFsrep23730_MOESM460_ESM.pdf [file 41598_2016_BFsrep23730_MOESM460_ESM.pdf]

**Modelling intracellular competition for calcium: kinetic and thermodynamic control of different molecular modes of signal decoding**

**Gabriela Antunes<sup>1\*</sup>, Antonio C. Roque<sup>1</sup>, and Fabio Marques Simoes de Souza<sup>2</sup>**

<sup>1</sup>Laboratory of Neural Systems (SisNe), Department of Physics, Faculdade de Filosofia Ciências e Letras de Ribeirão Preto, Universidade de São Paulo, Ribeirão Preto, Brazil

<sup>2</sup>Center for Mathematics, Computation and Cognition, Federal University of ABC, São Bernardo do Campo, Brazil

\*[gabrian@usp.br](mailto:gabrian@usp.br)

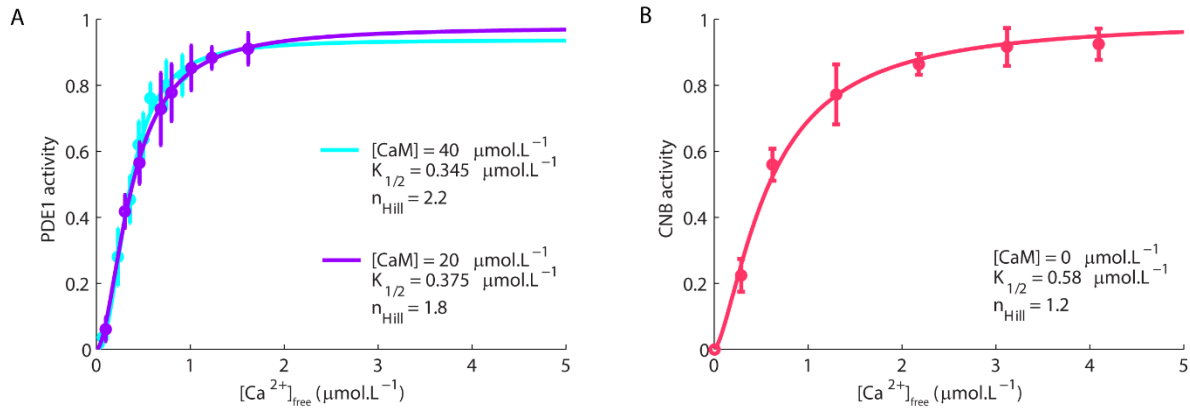

**Supplementary Figure S1:** Additional dose-response curves. (A) Dose-response curve of PDE1 activation as a function of the free calcium ion concentration ( $[Ca^{2+}]_{free}$ ) in the presence of other concentrations of CaM to demonstrate that, when the concentration of CaM is saturating, the  $K_{1/2}$  and  $n_{Hill}$  of the curves should not present large variations. (B) Dose-response curve of the interaction of the subunit CNB of CaN with  $Ca^{2+}$  in the absence of CaM. Experimentally, the  $K_{1/2}$  for this interaction was estimated in  $0.67 \mu\text{mol.L}^{-1}$ , and the  $n_{Hill}$  in  $1.2^{-1}$ . Each dot shows the average result of 10 runs of the model  $\pm$  sem. The curves were fitted with 95% of confidence interval.

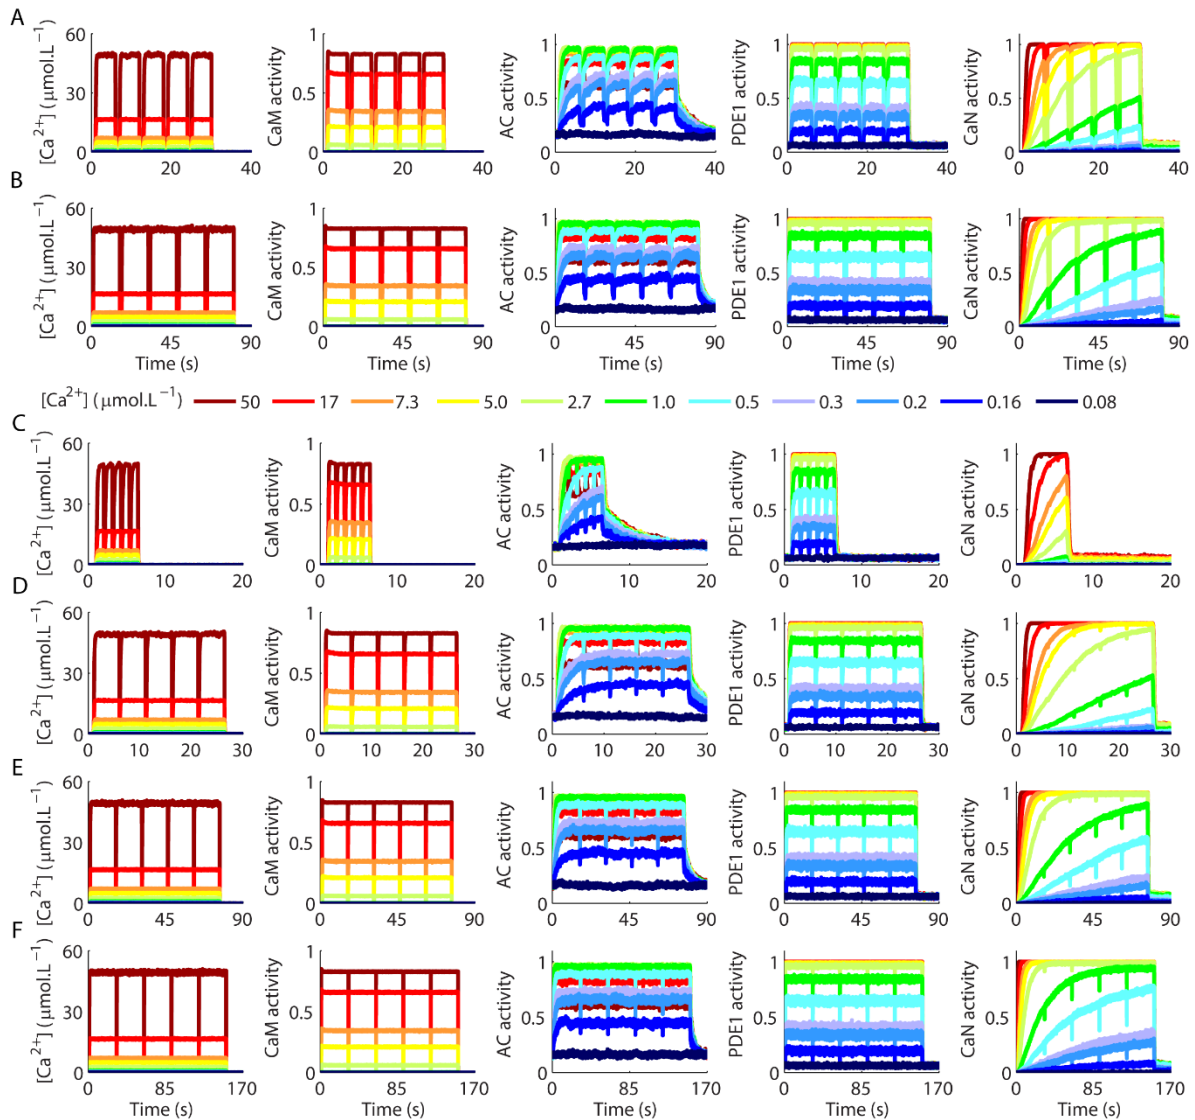

**Supplementary Figure S2:** Activations of the components of the model evoked by Ca<sup>2+</sup> pulses. (A and B) Activation of the components of the model stimulated by five Ca<sup>2+</sup> pulses with 1 s of inter pulse interval, 5 s (A) and 15 s (B) of duration and different peak concentrations. (C-F) Average responses of the components of the model to five Ca<sup>2+</sup> pulses released with 100 ms of inter pulse interval, durations of 1 s (C), 5 s (D), 15 s (E), and 30 s (F) and different peak concentrations. Each curve is the average of 10 runs of the model. The maximum activity of AC, CaN, and PDE1 corresponded to 1 μmol.L<sup>-1</sup>. The maximum activity of CaM corresponded to 40 μmol.L<sup>-1</sup>. The term CaM refers to CaM loaded with Ca<sup>2+</sup>.

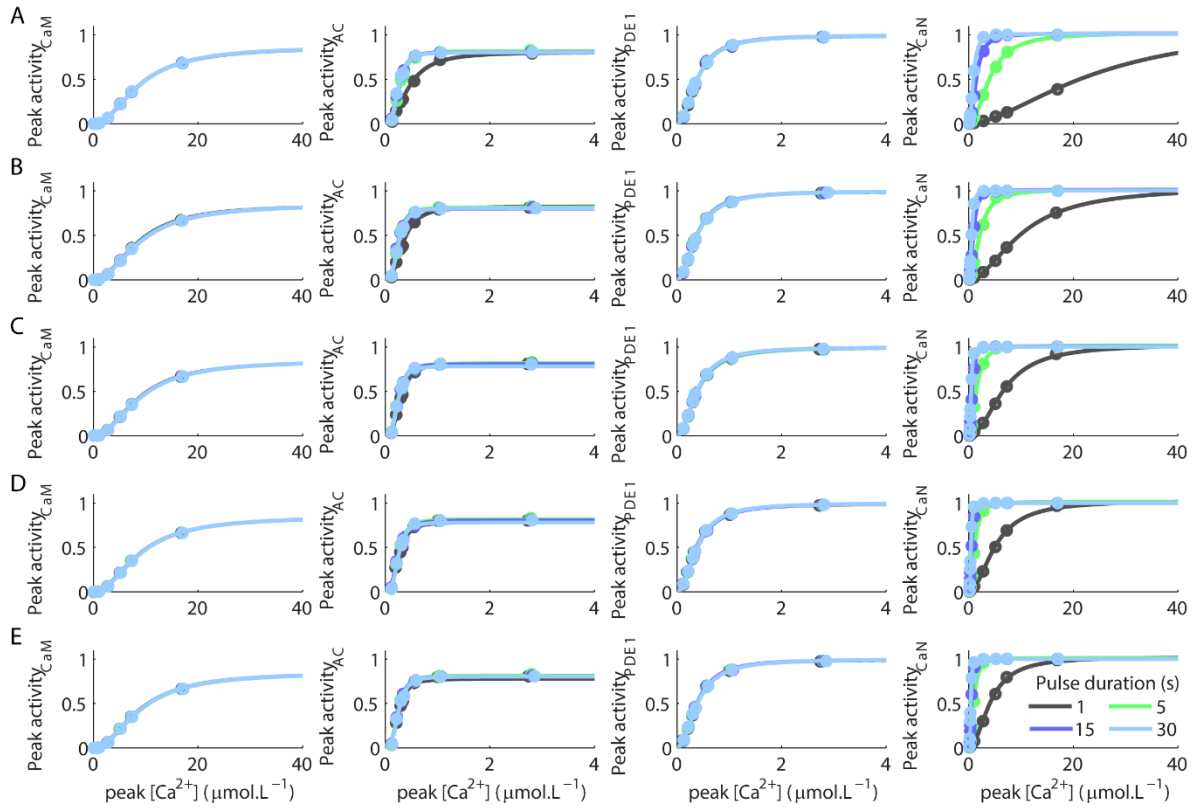

**Supplementary Figure S3:** Sigmoid curves of the activation of CaM, AC, PDE1 and CaN as a function of the peak amplitudes of  $\text{Ca}^{2+}$  transients. Trains of five  $\text{Ca}^{2+}$  pulses released with 100 ms of inter pulse interval were used to evoke the activation of CaM, AC, PDE1 and CaN (Fig. S3 C-F). Each train consisted of five  $\text{Ca}^{2+}$  pulses with a specific duration and peak amplitude. The duration of the pulses varied from 1 to 30 s, and their peak amplitude from  $0.08 \mu\text{mol.L}^{-1}$  to approximately  $50 \mu\text{mol.L}^{-1}$ . The peak activation of CaM, AC, PDE1 and CaN obtained as a function of the peak concentration of each one of the five  $\text{Ca}^{2+}$  pulses in a given train was used to plot dose-response curves. Panels A-E show the dose-response curves obtained for the first (A), the second (B), the third (C), the fourth (D), and the fifth (E)  $\text{Ca}^{2+}$  pulse of each train. These results indicated that the number of  $\text{Ca}^{2+}$  pulses and their durations regulated the activation of CaN and AC, but had no effects on the activation of CaM and PDE1.

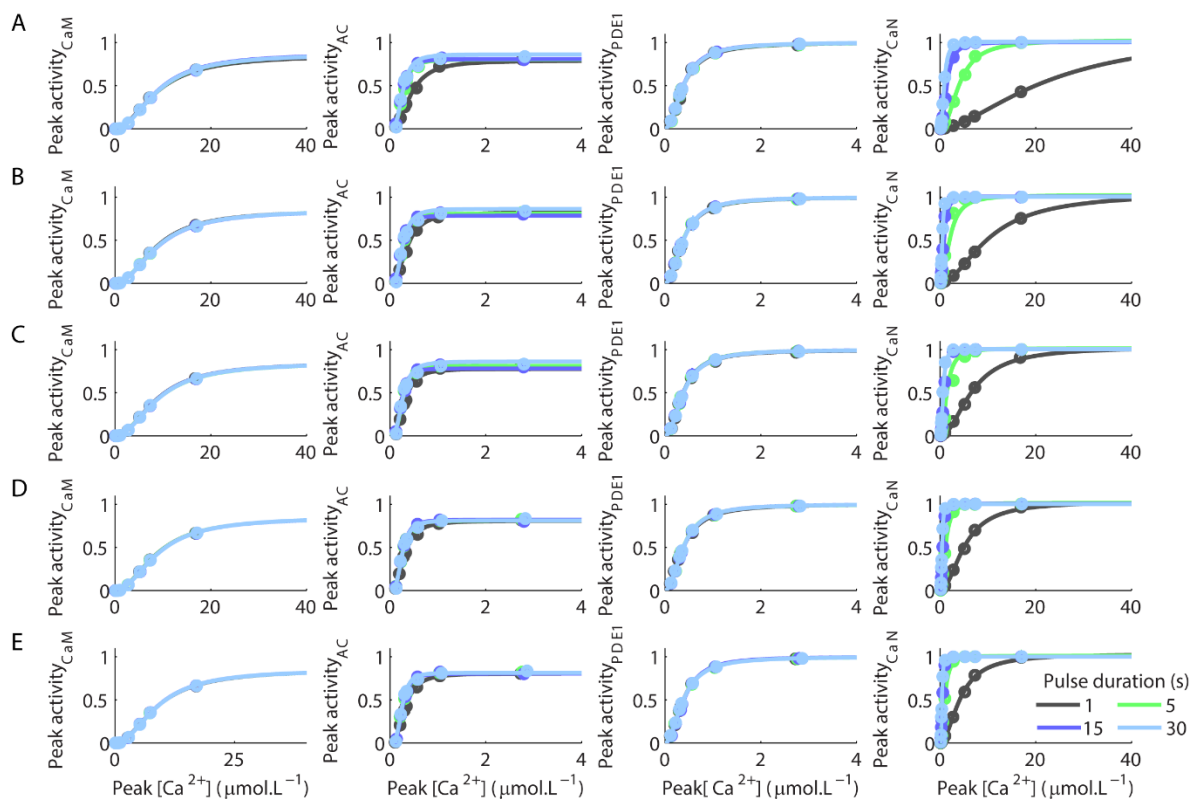

**Supplementary Figure S4:** Sigmoid curves of the activation of CaM, AC, PDE1 and CaN as a function of the peak amplitudes of  $\text{Ca}^{2+}$  transients. Trains of five  $\text{Ca}^{2+}$  pulses released with 1 s of inter pulse interval were used to evoke the activation of CaM, AC, PDE1 and CaN as showed in Fig. 2A-B and Supplementary Fig. S2 A-B. Each train consisted of five  $\text{Ca}^{2+}$  pulses with a specific duration and peak amplitude. The duration of the pulses varied from 1 to 30 s, and their peak amplitude from  $0.08 \mu\text{mol.L}^{-1}$  to approximately  $50 \mu\text{mol.L}^{-1}$ . The peak activation of CaM, AC, PDE and CaN obtained as a function of the peak concentration of each one of the five  $\text{Ca}^{2+}$  pulses in a given train was used to plot dose-response curves. Panels A-E show the dose-response curves obtained for the first (A, the same results appear in Fig. 2C-F), the second (B), the third (C), the fourth (D), and the fifth (E)  $\text{Ca}^{2+}$  pulse of each train.

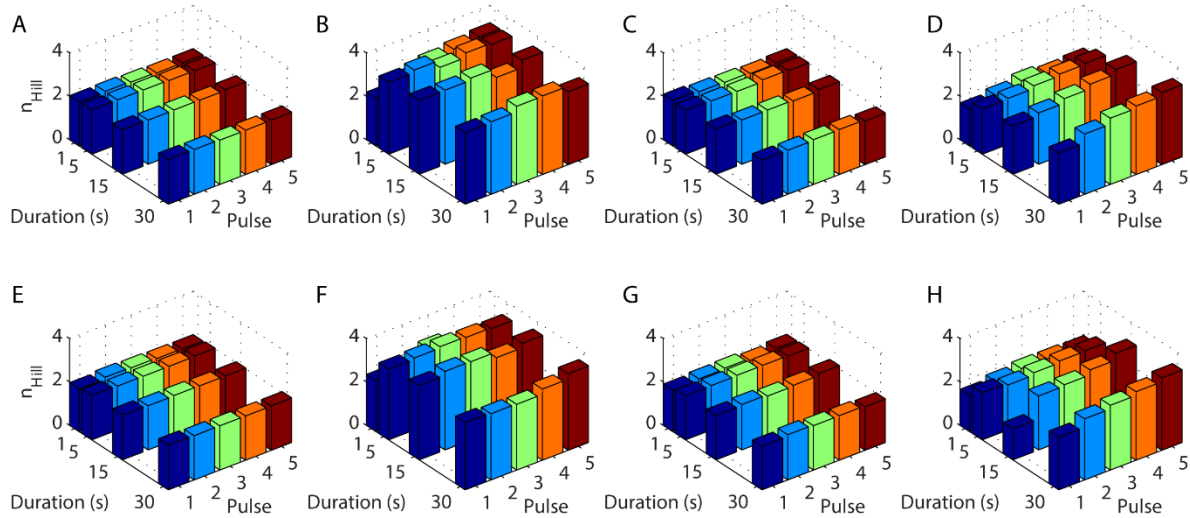

**Supplementary Figure S5:** Values of  $n_{Hill}$  obtained for each sigmoid curve showed in Fig. 2C-F and Supplementary Fig. S3-S4. The results indicate little variation of  $n_{Hill}$  as functions of the number of pulses used to stimulate the model, the durations of the pulses, and their inter pulse interval. A-D:  $n_{Hill}$  of CaM (A), AC (B), PDE1 (C), and CaN (D) obtained for pulses released with 1 s of inter pulse interval. E-H:  $n_{Hill}$  of CaM (E), AC (F), PDE1 (G), and CaN (H) obtained for pulses released with 100 ms of inter pulse interval.

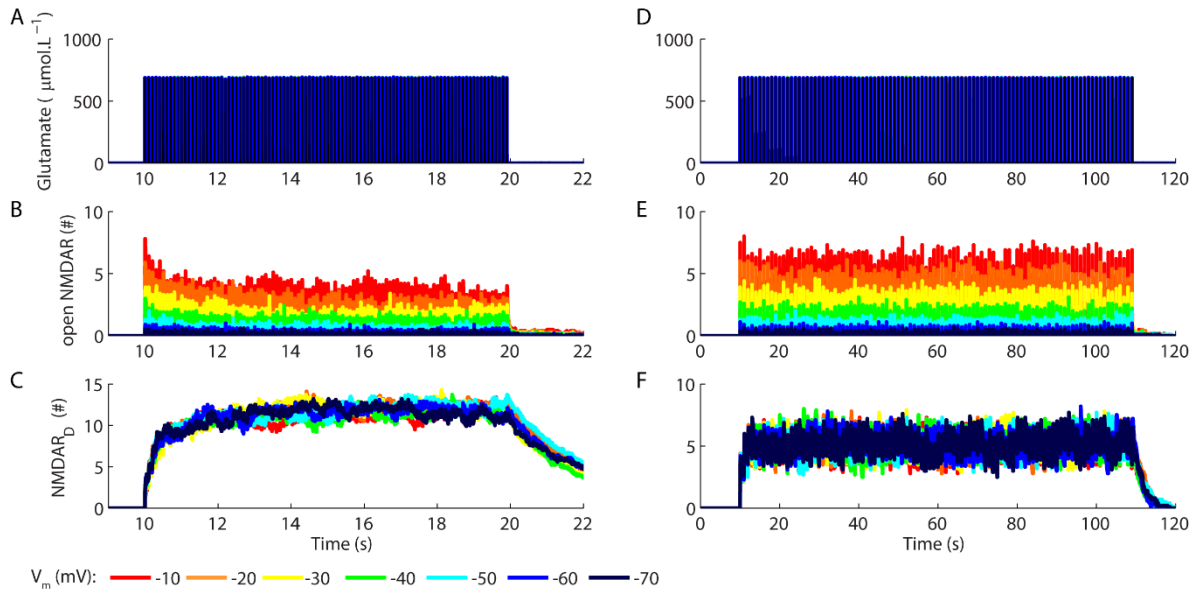

**Supplementary Figure S6:** Number of open NMDARs and desensitized NMDARs ( $\text{NMDAR}_D$ ) evoked by 100 pulses of glutamate released at 10 Hz and 1 Hz. Time courses of open NMDARs and desensitized NMDARs ( $\text{NMDAR}_D$ ) evoked by 100 pulses of glutamate released at 10 Hz (A-C) and 1 Hz (D-F) with  $V_m$  varying from -10 mV to -70 mV. Each curve shows the mean result of 10 runs of the model.

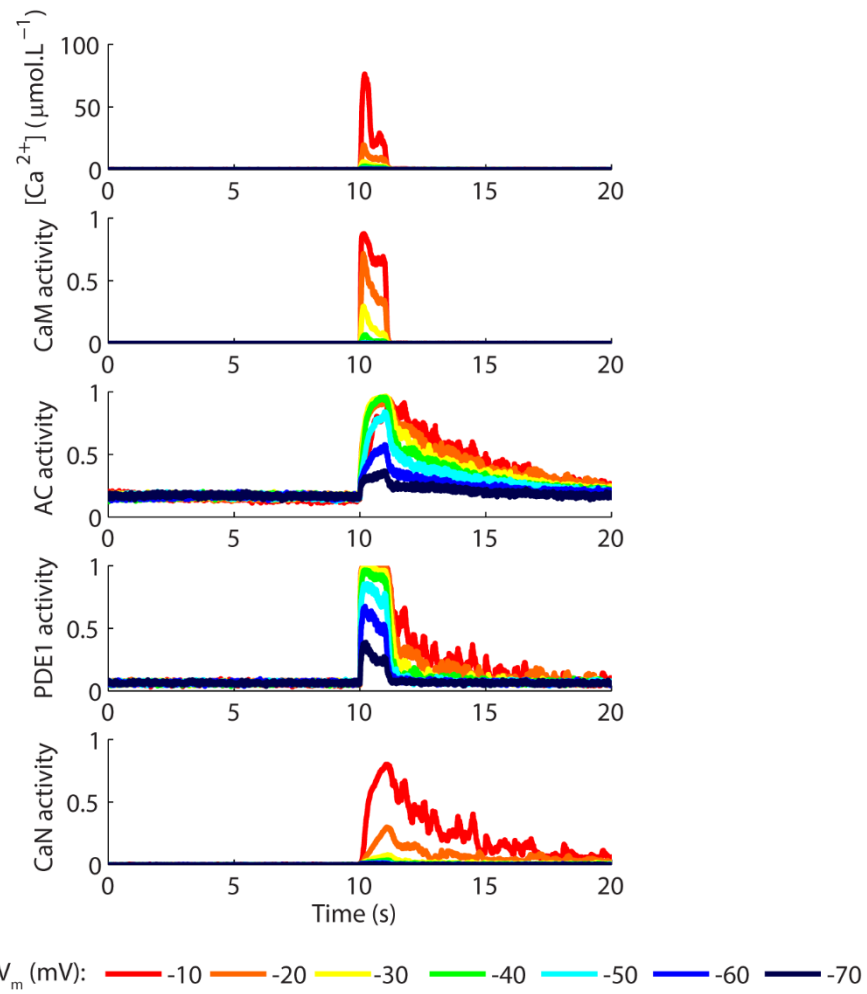

**Supplementary Figure S7:** Stimulation of the model with 100 glutamate pulses released at 100 Hz. Each curve shows the mean result of 10 runs of the model.



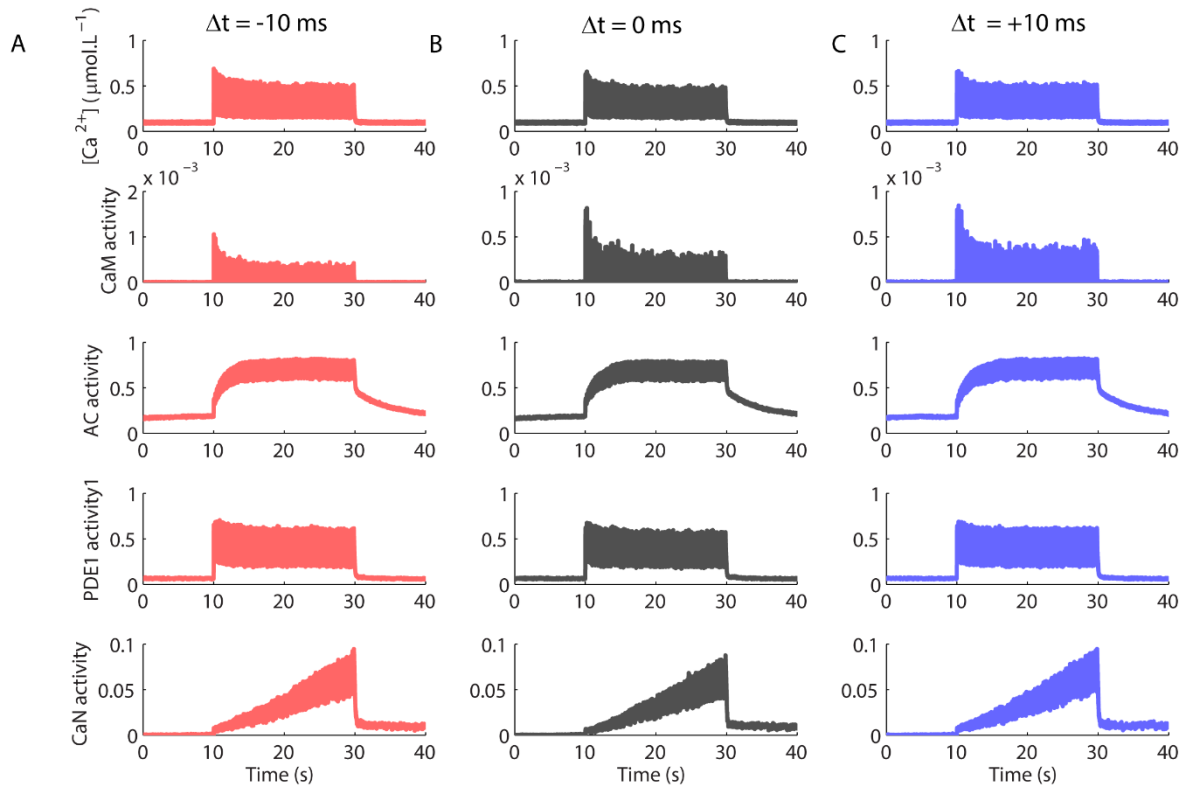

**Supplementary Figure S8:** Activation of the components of the model during protocols of STDP. The protocols consisted of sixty pulses of glutamate (amplitude of  $700 \mu\text{mol.L}^{-1}$ , 1 ms of duration) at 5 Hz paired with postsynaptic spikes. Each glutamate pulse was paired with a burst of three action potentials at 50 Hz <sup>2,3</sup>. According to experimental evidences, changes in the time interval ( $\Delta t$ ) between the glutamate pulse and the burst of postsynaptic spikes is enough to promote the occurrence of opposite forms of synaptic plasticity <sup>4</sup>. The spikes were simulated occurring 10 ms prior to each glutamate pulse ( $\Delta t = -10$  ms) (A), simultaneously with the glutamate pulses ( $\Delta t = 0$  ms) (B), or 10 ms after each glutamate pulse ( $\Delta t = +10$  ms) (C).  $\Delta t$  was defined by the closest action potential in time to the onset of the glutamate pulse. In our system, alterations of  $\Delta t$  did not promote significant differences in the  $Ca^{2+}$  signals of the model, which is consistent with evidences that STDP requires other sources of  $Ca^{2+}$  including voltage-dependent  $Ca^{2+}$  channels and metabotropic glutamate

receptors<sup>3</sup>. AC, PDE1 and CaN responded differently to the  $\text{Ca}^{2+}$  signals, but they did not discriminate  $\Delta t$ . Each curve is the average result of 50 runs of the model.

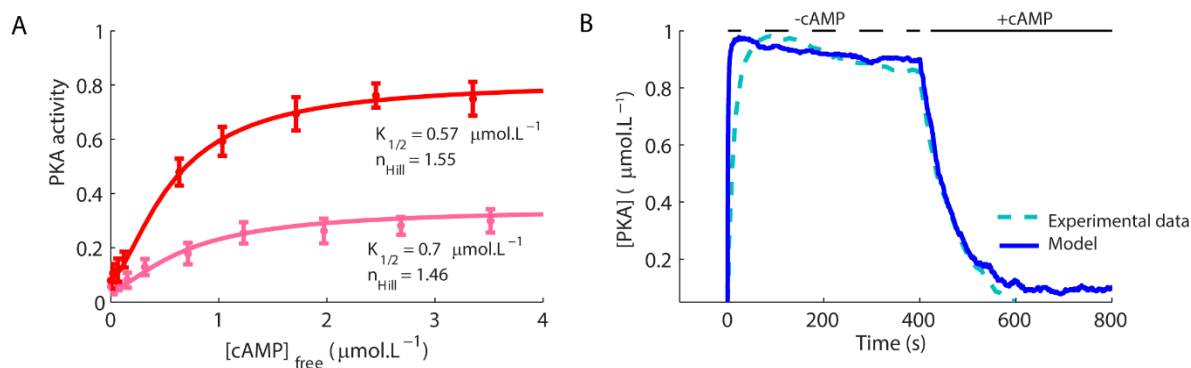

**Supplementary Figure S9:** Validation of the reactions and parameters used to simulate PKA. (A) Dose-responses curves of PKA activation as a function of the free concentration of cAMP ( $[cAMP]_{free}$ ) in presence or absence of an excess of its substrate Kemptide (1000  $\mu mol.L^{-1}$  of Kemptide and 1  $\mu mol.L^{-1}$  of PKA), which regulates its activation<sup>5</sup>. The values of  $K_{1/2}$  and  $n_{Hill}$  are in accordance with published experimental data ( $K_{1/2}$  varying around 0.58-0.6  $\mu mol.L^{-1}$  and  $n_{Hill}$  of 1.7<sup>6,7</sup>). (B) Time course for the association/dissociation of the regulatory (R) and catalytic (C) subunits of PKA in absence and presence of cAMP (500  $\mu mol.L^{-1}$ ) obtained with the model in comparison to an experimental curve from the literature<sup>8</sup>. See Supplementary Information (*cAMP dynamics and PKA*) for further details.

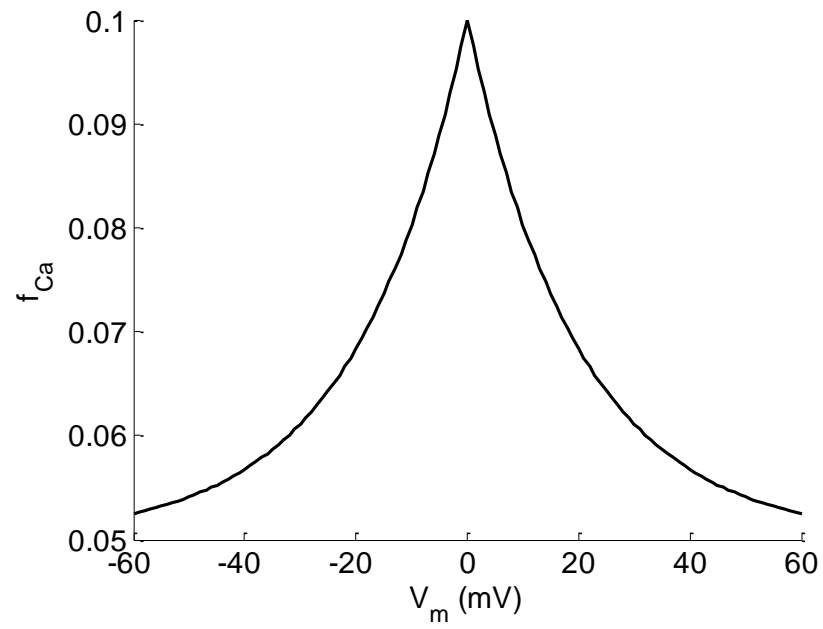

**Supplementary Figure S10:** The fractional calcium ( $f_{Ca}$ ) versus the membrane potential ( $V_m$ ) calculated with equations 2 and 3.

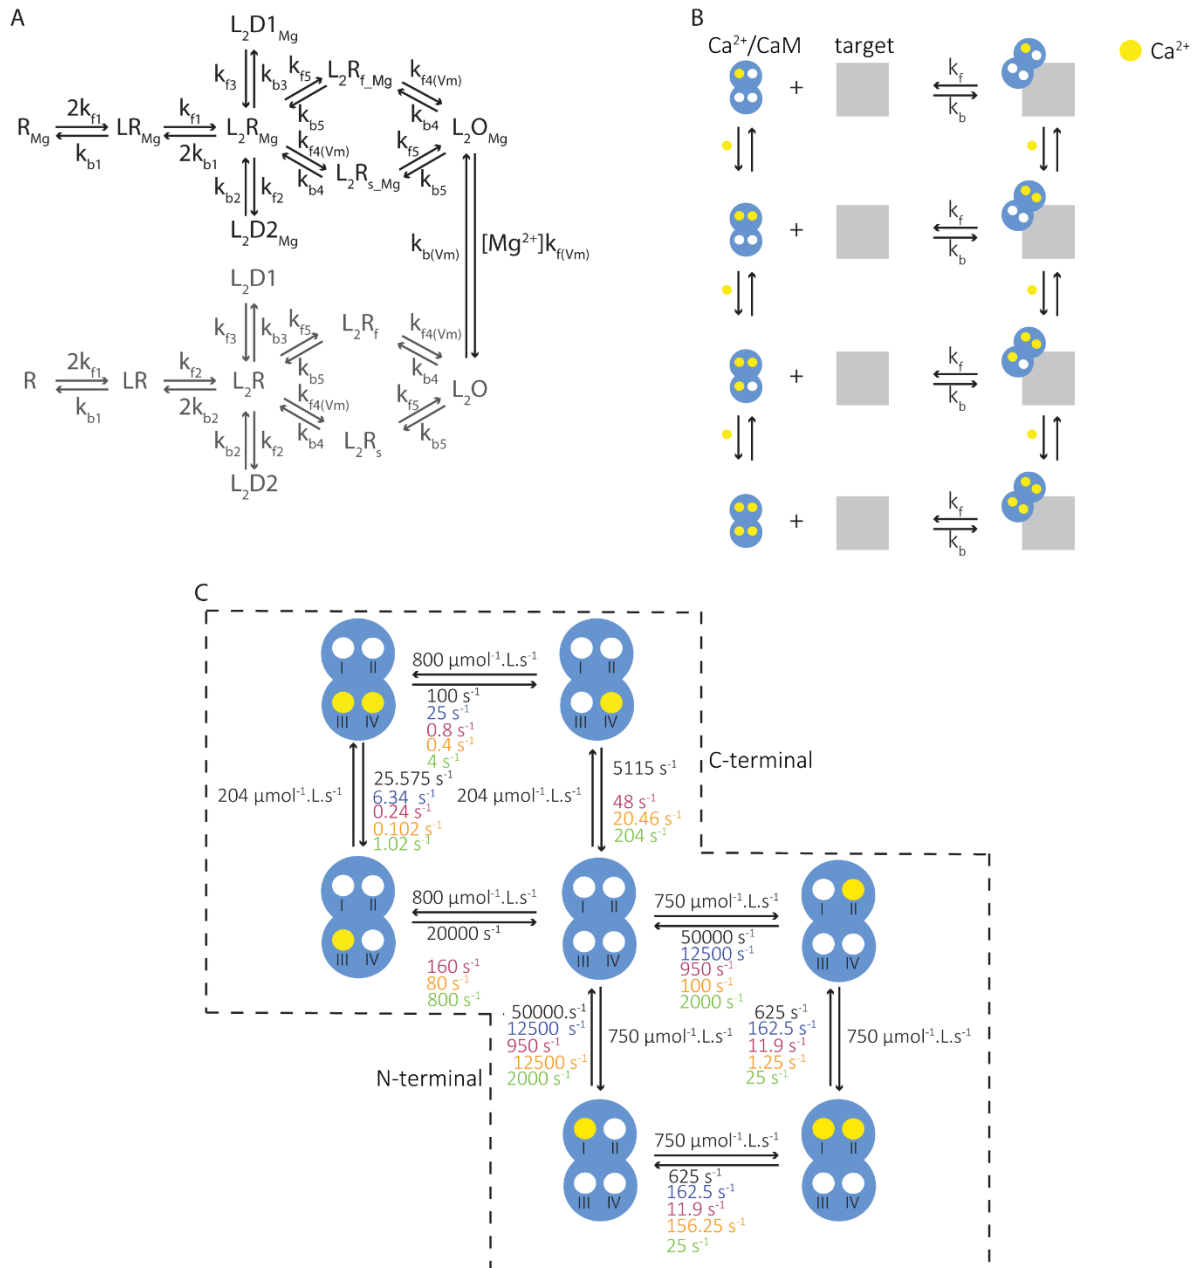

**Supplementary Figure S11:** Schematic representations of the components of the model and their mechanisms of interactions. (A) Schematic representation of the kinetic model used to simulate the NMDARs (R: NMDAR; L: glutamate;  $R_{Mg}$ : blocked NMDAR;  $R_s$  and  $R_f$ : intermediary states of the receptors; D1 and D2: desensitized receptors, O: open receptor;  $V_m$ : membrane potential; see references<sup>9-11</sup> for details). (B) Schematic representation of the

interaction between  $\text{Ca}^{2+}/\text{CaM}$  and its targets. For all targets simulated, the binding to  $\text{Ca}^{2+}/\text{CaM}$  can occur with one, two, three or four ions associated to its structure. For the interaction between PMCA and  $\text{Ca}^{2+}/\text{CaM}$ , CaM must be associated to one or two ions in the  $\text{Ca}^{2+}$ -binding sites located at the C-terminal. (C) The interaction of  $\text{Ca}^{2+}$  and the four  $\text{Ca}^{2+}$ -binding sites of CaM. The different  $\text{Ca}^{2+}$ -binding sites of CaM (I, II, III and IV) are represented in the cartoon. In the presence of its targets, CaM has a higher affinity for  $\text{Ca}^{2+}$ , which was simulated through changes in the rate constants for the dissociation of  $\text{Ca}^{2+}$  to each  $\text{Ca}^{2+}$ -binding site (rate constants for the dissociation of  $\text{Ca}^{2+}$  from CaM in the absence of targets (black), in presence of PMCA (blue), CaN (magenta), AC (orange), and PDE1 (green)).

## Supplementary Methods

Descriptions of the reactions and parameters used to simulate each component of the model.

The model was solved stochastically using the algorithm Gillespie SSA.

### *NMDARs*

NMDARs are glutamatergic ionotropic receptors that mediate the influx of  $\text{Ca}^{2+}$  to the cytosol of the hippocampal spine during the induction of long-term forms of synaptic plasticity<sup>12,13</sup>. Structurally, hippocampal neuronal NMDARs are composed by two GluN2 subunits, which are the subunits that bind glutamate, combined with two GluN1 subunits that bind to the co-agonists L-glycine and D-serine<sup>14</sup>. For simplicity, we assumed that NMDAR co-agonists are constantly present in the synaptic cleft, which is justified by the continuous release and uptake of L-glycine and D-serine from the extracellular environment<sup>14</sup>. Therefore, they were not simulated explicitly and the gating of NMDARs in the computational model was controlled solely by the glutamate concentration. According to the native composition of synaptic NMDARs<sup>12</sup>, two types of receptors with distinct kinetic properties were included in the model, di-heteromeric receptors GluN1/GluN2A, which account for approximately 65% of the NMDARs in the hippocampal CA1 of adult animals, and the receptors GluN1/GluN2B that was considered to represent the remaining 35% of the total NMDARs<sup>15,16</sup>. A total of 20 NMDARs were included in the model<sup>17</sup>. Both receptor types were simulated with the same set of reactions, but using different rate constants for the state transitions<sup>11</sup>.

A unique feature of NMDARs is their mechanism of activation that requires both the binding of glutamate and the depolarization of the postsynaptic cell membrane to promote the release of magnesium ions ( $\text{Mg}^{2+}$ ) that block the pore of their channels in a membrane

potential ( $V_m$ )-dependent manner<sup>12,18</sup>. The depolarization-dependent removal of  $Mg^{2+}$  occurs only from the open channel<sup>18</sup>. In consequence, NMDARs detect the coincidence between the presynaptic activation, which releases glutamate, and the postsynaptic membrane depolarization<sup>13</sup>. The kinetic model used to simulate both types of NMDARs in this work was based on a previous model developed to simulate the gating of NMDAR channels in absence of  $Mg^{2+}$ <sup>19</sup>, which was recently expanded to incorporate the interaction of NMDARs with  $Mg^{2+}$  (Supplementary Figure S11A)<sup>9,10</sup>. All the rate constants used to simulate each type of NMDAR were taken from published models<sup>9-11</sup>. The complete description of the reactions and parameters used to simulate the NMDARs is listed in Supplementary Table I (Reac1-Reac17).

### ***Ca<sup>2+</sup> Dynamics***

The mechanisms of  $Ca^{2+}$  dynamics implemented in our stochastic model consisted of  $Ca^{2+}$  influx, buffering and extrusion from the cytosol. We have not included  $Ca^{2+}$  diffusion across the spine neck to its parental dendrite in our model because it accounts for less than 10% of the  $Ca^{2+}$  clearance<sup>20</sup>.

The influx of  $Ca^{2+}$  in the model occurs exclusively through NMDAR channels, and was given by the follow equation:

$$Influx_{NMDAR} = \frac{\sum NMDAR_{open} I_{NMDA} f_{Ca}^{n_A}}{2F.Vol_{spine}} \quad (1)$$

where  $NMDAR_{open}$  stands for the number of open NMDAR channels unblocked by  $Mg^{2+}$



(Supplementary Figure S11A),  $I_{\text{NMDA}}$  is the maximum unitary channel current (5 pA)<sup>21</sup>,  $F$  is the Faraday constant (96485 C.mol<sup>-1</sup>), 2 refers to the Ca<sup>2+</sup> valence,  $n_A$  is the Avogadro number (6.02 10<sup>23</sup> mol<sup>-1</sup>) and  $f_{Ca}$  is the fraction of Ca<sup>2+</sup> from the  $I_{\text{NMDA}}$ .

Experimental data demonstrated that the fractional Ca<sup>2+</sup> current of the NMDARs is regulated by the  $V_m$  and corresponds to approximately 10-17% of the NMDAR-mediated current<sup>22-25</sup>. Based on experimental observations of  $f_{Ca}(V_m)$ , we used an exponential description with a maximum fractional Ca<sup>2+</sup> current of 10% at the reversal potential (Supplementary Fig. S10):

$$f_{Ca}(V_m < 0) = 0.05 + 0.05 \exp((V_m - E_{rev})/20) \quad (2)$$

$$f_{Ca}(V_m \geq 0) = 0.05 + 0.05 \exp(-(V_m - E_{rev})/20) \quad (3)$$

where  $V_m$  is the membrane potential,  $E_{rev}$  is the NMDAR reversal potential (0 mV). However, since BioNetGen<sup>26</sup>, the software used to implement the model, does not allow the explicit simulation of equations such as (1), we simulated the influx of Ca<sup>2+</sup> in the BioNetGen as a first order reaction:

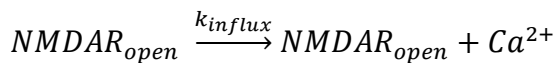

The rate constant  $k_{influx}$  was estimated with a multiplicative factor (8.10<sup>6</sup> mol<sup>-1</sup>.L) applied to equation (1) to obtain the correct time course and peak [Ca<sup>2+</sup>]:

$$k_{influx} = 8e6 \frac{\sum NMDAR_{open} I_{NMDA} f_{Ca^{nA}}}{2F.Vol_{spine}} \quad (4)$$

Two  $Ca^{2+}$  buffers were included in the model: an unspecific buffer (UB) and CaM, which act as a buffer and as a  $Ca^{2+}$ -signal mediator<sup>27,28</sup>. The interaction of  $Ca^{2+}$  to UB was simulated with the binding of a single ion to each UB molecule. Thus, UB interacts with  $Ca^{2+}$  through a reaction for the complex formation ( $Ca^{2+} + UB \xrightarrow{k_f} (Ca^{2+})UB$ ,  $k_f = 50 \mu\text{mol}^{-1} \cdot \text{L} \cdot \text{s}^{-1}$ ), and another for its dissociation ( $(Ca^{2+})UB \xrightarrow{k_b} Ca^{2+} + UB$ ,  $k_b = 500 \text{ s}^{-1}$ ) (Supplementary Table I, Reac19).

In contrast to UB, CaM interacts with four  $Ca^{2+}$  that bind to two pairs of  $Ca^{2+}$  binding sites located in two distinct globular domains (the C-terminal and N-terminal domains)<sup>27,28</sup>. Each pair of  $Ca^{2+}$ -binding sites of CaM binds  $Ca^{2+}$  sequentially and with positive cooperativity, but there is no cooperativity among sites located on distinct CaM domains<sup>29</sup>. The  $Ca^{2+}$ -binding sites located at the N-terminal domain are termed I and II and the sites located at the C-terminal are termed III and IV. To simulate the interaction between CaM and  $Ca^{2+}$ , it was assumed that each CaM domain has two macroscopic association constants,  $K_1$  and  $K_2$ .  $K_1$  is the sum of the microscopic equilibrium constants assuming that individual  $Ca^{2+}$ -binding sites of either domain are occupied sequentially<sup>30,31</sup>:

$$K_{N1} = k_I + k_{II}, \text{ for the N-terminal domain} \quad (5)$$

$$K_{C1} = k_{III} + k_{IV}, \text{ for the C-terminal domain} \quad (6)$$

where  $k_I$ ,  $k_{II}$ ,  $k_{III}$ , and  $k_{IV}$ , are the microscopic equilibrium constants of  $Ca^{2+}$ -binding sites I,

II, III, and IV respectively. The cooperativity observed for the binding of a second  $\text{Ca}^{2+}$  to either CaM globular domain defines that<sup>30,31</sup>:

$$K_{N2} = k_n k_I k_{II}, \text{ for the N-terminal domain} \quad (7)$$

$$K_{C2} = k_c k_{III} k_{IV}, \text{ for the C-terminal domain} \quad (8)$$

where  $k_n$  and  $k_c$  are the intradomain cooperative constants for the binding of the second  $\text{Ca}^{2+}$  to the N- and C-terminal, respectively<sup>30,31</sup>. A complete description of the reactions and rate constants used in the model was published previously<sup>32</sup> and is listed in the Supplementary Table I (Reac20- Reac27).

The concentration of both buffers, CaM and UB, were set as  $40 \mu\text{mol.L}^{-1}$  in order to reproduce the endogenous buffer capacity ( $k_E$ ) observed in the CA1 dendritic spines. The  $k_E$  is defined, in generic terms, as the ratio between the  $\text{Ca}^{2+}$  ions bound to buffers and the number of ions that are free. Taking the mean number of free  $\text{Ca}^{2+}$  during simulated resting conditions ( $\sim 6$ ) and the number of bound  $\text{Ca}^{2+}$  ( $\sim 18$  ions bound to the UB and 100 ions bound to CaM), the value of  $k_E$  obtained with the model is approximately 20 as observed in native hippocampal spines<sup>20</sup>.

Two different species account for  $\text{Ca}^{2+}$  extrusion in the model: the plasma membrane  $\text{Ca}^{2+}$ -ATPase (PMCA) and the Sodium ( $\text{Na}^+$ )/ $\text{Ca}^{2+}$ -exchanger (NCX). PMCA is activated by binding to  $\text{Ca}^{2+}$ /CaM, which promotes an increase in its catalytic rates through the release of an autoinhibitory domain close to its catalytic site, and a drop of its  $K_D$  for  $\text{Ca}^{2+}$  from 10-30  $\mu\text{mol.L}^{-1}$  to 0.2-0.75  $\mu\text{mol.L}^{-1}$ <sup>33</sup>. To simulate the activity of PMCA, a basal catalytic rate was implemented representing the activity of the pump in absence of saturating  $\text{Ca}^{2+}$ /CaM<sup>33</sup>. The basal catalytic activity was simulated considering the reversible formation of a complex

between the PMCA and  $\text{Ca}^{2+}$  using one reaction to simulate the complex formation ( $\text{Ca}^{2+} + \text{PMCA} \xrightarrow{k_f} (\text{Ca}^{2+})\text{PMCA}$ ),  $k_f = 55 \text{ } \mu\text{mol}^{-1}.\text{L}.\text{s}^{-1}$ ), another for the complex dissociation ( $(\text{Ca}^{2+})\text{PMCA} \xrightarrow{k_b} \text{Ca}^{2+} + \text{PMCA}$ ,  $k_b = 250 \text{ s}^{-1}$ ), and an irreversible step that represents the pumping of  $\text{Ca}^{2+}$  to the outside of the cellular compartment ( $(\text{Ca}^{2+})\text{PMCA} \xrightarrow{k_{cat}} \text{PMCA}$ ,  $k_{cat} = 30 \text{ s}^{-1}$ )<sup>33,34</sup>. Note that the  $\text{Ca}^{2+}$  in the outside of the cellular compartment was not simulated explicitly.

To simulate the interaction of PMCA to CaM, we assumed that it can occur at low  $[\text{Ca}^{2+}]$  involving partially loaded forms of the complex  $\text{Ca}^{2+}/\text{CaM}$  (Supplementary Figure S11B)<sup>35</sup>. Such interaction does not lead to the release of the autoinhibitory domain of PMCA, but are likely to contribute to a fast activation of PMCA when the level of  $\text{Ca}^{2+}$  rises<sup>35</sup>. However, we assumed that the binding of  $\text{Ca}^{2+}/\text{CaM}$  to PMCA is sequentially ordered: the C-terminal associates first, followed by the subsequent binding of the N-terminal<sup>36,37</sup>. Thus, we assumed that CaM associated with one or two  $\text{Ca}^{2+}$  at the C-terminal can interact with PMCA. The binding of both CaM terminals are required for full activation of PMCA<sup>38</sup>. The association of CaM to PMCA increases its affinity for  $\text{Ca}^{2+}$  as observed for other CaM targets. A four-fold increase in the microscopic equilibrium constants for the binding of  $\text{Ca}^{2+}$  to CaM associated with PMCA was used in the model, which was implemented through a four-fold reduction in the rate constants for the dissociation of  $\text{Ca}^{2+}$  from CaM bound to PMCA based on experimental data (Supplementary Figure S11C, Supplementary Table I: Reac28-Reac38)<sup>34,39</sup>.

A second species of the model that regulates the intracellular levels of  $[\text{Ca}^{2+}]$  is NCX, which is a bidirectional transporter that exchange  $\text{Na}^+/\text{Ca}^{2+}$ , but in the model the transport of  $\text{Na}^+$  were not implemented explicitly. The efflux of  $\text{Ca}^{2+}$  was simulated as a non-conservative

process, and extracellular  $[Ca^{2+}]$  was not modelled explicitly as described previously<sup>32</sup> (Supplementary Table I: Reac39). A constant first-order rate of leak of  $Ca^{2+}$  was included in the model to counteract the basal activity of PMCA and NCX and to maintain the resting  $[Ca^{2+}]$  around 80-150 nmol.L<sup>-1</sup> (Supplementary Table I: Reac40).

### *CaN*

CaN is a heterodimeric enzyme composed by a catalytic subunit (CNA), which contains a  $Ca^{2+}$ /CaM-binding site, and a regulatory subunit (CNB) with four  $Ca^{2+}$ -binding sites, two of them with very high affinities for  $Ca^{2+}$  and two with moderate affinities<sup>40,41</sup>. The interaction of  $Ca^{2+}$  with CNB is a precondition for the binding of  $Ca^{2+}$ /CaM to CNA<sup>1,40,42,43</sup>.

Structurally, CNB is very similar to CaM and consists of two globular domains, each one containing a pair of  $Ca^{2+}$ -binding sites<sup>44</sup>. Based on this similarity, we used the same approach implemented to simulate the interaction of  $Ca^{2+}$  with CaM to define the microscopic parameters for the interaction of  $Ca^{2+}$  to CNB. Thus, we considered that the binding of  $Ca^{2+}$  to each CNB globular domain has two macroscopic association constants,  $K_1$  and  $K_2$ .  $K_1$  is the sum of the microscopic equilibrium constants for the binding of the first ion to either pair of  $Ca^{2+}$ -binding sites (equations (5) and (6)) assuming that the sites are occupied sequentially<sup>30,31</sup>.  $K_2$  is the macroscopic constant for the binding of the second ion to either pair of  $Ca^{2+}$ -binding sites, and it is defined by equations (7) and (8)<sup>30,31</sup>. The  $Ca^{2+}$ -binding sites located in the CNB C-terminal, termed EF-hand III and IV, have higher  $Ca^{2+}$  affinities than the EF-hands I and II, located at the N-terminal<sup>5</sup>. The macroscopic binding constants for these sites have been determined: 0.094  $\mu\text{mol.L}^{-1}$  ( $K_{C1}$ ), 0.036  $\mu\text{mol.L}^{-1}$  ( $K_{C2}$ ), 1.1  $\mu\text{mol.L}^{-1}$  ( $K_{N1}$ ), and 0.6  $\mu\text{mol.L}^{-1}$  ( $K_{N2}$ )<sup>5,41</sup>. Assuming that the microscopic affinity for either site of

a given CaN domain is equivalent, we calculated the values of  $k_{III}$  and  $k_{IV}$  ( $0.047 \mu\text{mol.L}^{-1}$ ),  $k_I$  and  $k_{II}$  ( $0.55 \mu\text{mol.L}^{-1}$ ), and the values of the cooperative constant for the C-terminal ( $k_c = 16.29 \mu\text{mol}^{-1}.\text{L}$ ), and for the N-terminal ( $k_n = 2 \mu\text{mol}^{-1}.\text{L}$ ). The backward rate constant ( $k_b$ ) for the unbinding of the first  $\text{Ca}^{2+}$  from the C-terminal was set as  $0.03 \text{ s}^{-1}$ <sup>33</sup>, which resulted in a forward rate constant ( $k_f$ ) of  $0.64 \mu\text{mol}^{-1}.\text{L}.\text{s}^{-1}$ . The value of  $k_f$  was kept equal for the binding of  $\text{Ca}^{2+}$  to both sites on the same terminal. In consequence, the  $k_b$  for the dissociation of  $\text{Ca}^{2+}$  from the second site filled was calculated as  $0.0018 \text{ s}^{-1}$ . For the sites located at the N-terminal, assuming a  $k_b$  of  $0.05 \text{ s}^{-1}$ <sup>41</sup>, the  $k_f$  for the binding of the first  $\text{Ca}^{2+}$  was calculated as  $0.09 \mu\text{mol}^{-1}.\text{L}.\text{s}^{-1}$ . Then, the  $k_b$  for the dissociation of the second  $\text{Ca}^{2+}$  from the N-terminal was calculated as  $0.025 \text{ s}^{-1}$ . The bindings of  $\text{Ca}^{2+}$  to the  $\text{Ca}^{2+}$ -binding sites located on different domains of CNB were simulated as independent events (Supplementary Table I: Reac41-Reac44).

After the binding of  $\text{Ca}^{2+}$  to CNB, CNA interacts with  $\text{Ca}^{2+}/\text{CaM}$  with a stoichiometry of 1:1<sup>41-43</sup>. CaN has the highest affinity reported for CaM fully loaded with  $\text{Ca}^{2+}$  ( $\sim \text{pmol.L}^{-1}$ )<sup>45</sup>. It can also interact with CaM partially loaded with  $\text{Ca}^{2+}$ , but with lower affinity<sup>46</sup>. We simulated the interaction of CaN with fully loaded  $\text{Ca}^{2+}/\text{CaM}$  using parameters reported in the literature (for the complex formation  $k_f = 46 \mu\text{mol}^{-1}.\text{L}.\text{s}^{-1}$ , and for the complex dissociation  $k_b = 0.0012 \text{ s}^{-1}$ )<sup>45</sup>. To implement the interaction between CaN and CaM partially loaded with  $\text{Ca}^{2+}$ , we kept the  $k_f$  unchanged ( $46 \mu\text{mol}^{-1}.\text{L}.\text{s}^{-1}$ ), and recalculate  $k_b$  using affinities reported for the interaction of CaN with isolated domains of CaM ( $K_D = 1$  and  $7 \mu\text{mol.L}^{-1}$  for the C ( $k_b = 46 \text{ s}^{-1}$ ) and N-terminal ( $k_b = 322 \text{ s}^{-1}$ ), respectively)<sup>46</sup> (Supplementary Table I: Reac45-Reac48). Like many other CaM targets<sup>47-49</sup>, CaN increases considerable the affinity of  $\text{Ca}^{2+}$  for CaM but it preserves the order of magnitude that separates the affinities between the  $\text{Ca}^{2+}$ -binding sites located at the C and N-terminal<sup>46</sup>. This process was

implemented using equations (5)-(8) to calculate the rate constants. The values of  $k_f$  for the interaction between  $\text{Ca}^{2+}$  and the  $\text{Ca}^{2+}$ -binding sites of CaM in the presence or absence of CaN were kept unchanged because the presence of CaM targets usually modifies the rate constants for the  $\text{Ca}^{2+}$  dissociation from CaM structure<sup>47,48</sup>. The  $k_b$ s for the interaction of the first and second ion to each CaM domain associated to CaN were calculated considering the microscopic binding for the sites  $k_I$  and  $k_{II}$  ( $0.8 \mu\text{mol}^{-1}\cdot\text{L}$ ) and  $k_{III}$  and  $k_{IV}$  ( $5 \mu\text{mol}^{-1}\cdot\text{L}$ ). We kept  $k_n$  ( $80 \mu\text{mol}^{-1}\cdot\text{L}$ ), and  $k_c$  ( $200 \mu\text{mol}^{-1}\cdot\text{L}$ ) unchanged by the presence of CaN<sup>32</sup>. Thus, the values for the dissociation rate constants were:  $k_{b\_I}$  and  $k_{b\_II} = 950$  ( $11.9$ )  $\text{s}^{-1}$ ,  $k_{b\_III} = 160$  ( $0.8$ )  $\text{s}^{-1}$ , and  $k_{b\_IV} = 48$  ( $0.24$ )  $\text{s}^{-1}$  (the number in parenthesis are the rate constants for the dissociation of  $\text{Ca}^{2+}$  when both  $\text{Ca}^{2+}$ -binding sites on a given domain are filled) (Supplementary Figure S11C, Supplementary Table I: Reac48-Reac55).

## AC

In our model, AC activity was regulated solely by its interaction with  $\text{Ca}^{2+}/\text{CaM}$ . Note, however, that its activity can also be stimulated by the subunit  $G_{s\alpha}$  of the trimeric G protein, and by forskolin (except AC9), a plant diterpene<sup>50</sup>. AC can interact with CaM fully loaded or partially loaded with  $\text{Ca}^{2+}$ <sup>51</sup>. The stimulation of AC by partially loaded CaM requires, preferentially, the filling of at least two  $\text{Ca}^{2+}$ -binding sites of CaM (sites II and IV), which implies that AC must interact with both CaM lobes simultaneously<sup>52</sup>. Assuming that the affinity between CaM and AC is equal to the concentration of CaM required to activate the half-maximum concentration of AC available, the absence of  $\text{Ca}^{2+}$  bound to site II or site IV of CaM promotes a 15-fold and 30-fold decrease in the affinity of AC for CaM, respectively<sup>51</sup>. The filling of the  $\text{Ca}^{2+}$ -binding site III is also important and its absence promotes a 5-fold reduction in the affinity of the complex formed<sup>51</sup>. However, the filling of

site I causes only a 2-fold reduction in the affinity of AC for CaM<sup>51</sup>. Thus, we implemented the interaction of AC partially loaded with Ca<sup>2+</sup> considering that the absence of the filling of site IV, II, III, and I promotes a 30-fold, 15-fold, 5-fold, and a 2-fold decrease in AC affinity for CaM, respectively<sup>51</sup>. The absence of Ca<sup>2+</sup> bound to any two or three binding sites simultaneously was simulated considering a multiplicative effect in the decrease of the affinity for the interaction between AC and CaM. Thus, for example, the absence of Ca<sup>2+</sup> bound to sites II and III, or sites III and IV, or sites II and IV, or sites I, II and IV was simulated with an affinity 75-fold, 150-fold, 450-fold and 900-fold smaller than the affinity of AC for CaM fully loaded with Ca<sup>2+</sup>. The affinity for the interaction between CaM fully loaded with Ca<sup>2+</sup> and AC was defined as the EC<sub>50</sub> measured experimentally (0.05 μmol.L<sup>-1</sup>)<sup>51</sup>. The rate constant for the dissociation between AC and Ca<sup>2+</sup>/CaM was estimated based on the half-time for the dissociation of CaM from synaptic membranes ( $k_b = 0.01 \text{ s}^{-1}$ )<sup>53</sup>. With these values, the rate constant for the association of AC with CaM fully loaded with Ca<sup>2+</sup> was calculated ( $k_f = 0.2 \text{ μmol}^{-1} \cdot \text{L} \cdot \text{s}^{-1}$ ). To simulate the interaction between AC and the other states of CaM partially loaded with Ca<sup>2+</sup>, we kept  $k_f$  unchanged and recalculated  $k_b$  considering the decrease in the affinity between AC1 and CaM described above (Supplementary Table I: Reac56-Reac70).

Experimental data have indicated that the presence of AC greatly decreases the rate for Ca<sup>2+</sup> dissociation from CaM for three sites, which we assumed to be sites II, III, and IV, but appears to play a less significant role for a fourth site (site I)<sup>52</sup>. Thus, we kept the rate constants for the association of Ca<sup>2+</sup> to CaM in presence or absence of AC unchanged. We considered a 500-fold decrease in the rate constant for the dissociation of Ca<sup>2+</sup> from site II, a 250-fold decrease in the dissociation of Ca<sup>2+</sup> from site III or IV, and a 4-fold reduction in the dissociation of Ca<sup>2+</sup> from Ca<sup>2+</sup>-binding site I of CaM in presence of AC (Supplementary



Figure S11C, Supplementary Table I: Reac71-Reac78). These values were based on experimental data<sup>52</sup>, but were adjusted to ensure that the model of AC was able to simulate the  $\text{Ca}^{2+}$  requirement observed experimentally, measured as the  $K_{1/2}$  (Fig. 1I).

Not only  $\text{Ca}^{2+}$  stimulates AC through the complex  $\text{Ca}^{2+}/\text{CaM}$ , but it also inhibits its activity at high concentrations ( $\sim 50\text{-}80\ \mu\text{M}$ ) *in vitro* and *in vivo*<sup>54,55</sup>.  $\text{Ca}^{2+}$  inhibition of AC was implemented as simple reactions of binding/unbinding ( $\text{Ca}^{2+} + \text{AC} \xrightarrow{k_f} (\text{Ca}^{2+})\text{AC}$ ,  $k_f = 0.1\ \mu\text{M}^{-1}\cdot\text{s}^{-1}$ ,  $(\text{Ca}^{2+})\text{AC} \xrightarrow{k_b} \text{Ca}^{2+} + \text{AC}$ ,  $k_b = 8\ \text{s}^{-1}$ ), and the parameters used were estimated from the  $K_D$  observed experimentally<sup>55</sup> (Supplementary Table I: Reac79). We assumed that the inhibitory binding of  $\text{Ca}^{2+}$  to AC is independent of AC interaction with the  $\text{Ca}^{2+}/\text{CaM}$  complex.

### ***PDE1***

Eleven subfamilies of PDEs have been identified and, in all organisms, multiple isoforms of PDEs appear to be involved in the tight control of cAMP concentration<sup>56</sup>. PDE1A2, a member of the PDE1 subfamily, is highly expressed in the brain<sup>57</sup>. PDE1A2 (referred here simply as PDE1) can interact with CaM fully or partially saturated with  $\text{Ca}^{2+}$ , but it requires CaM bound to three or four ions to be stimulated<sup>58,59</sup>. CaM fully saturated with  $\text{Ca}^{2+}$  interacts with PDE1 with affinity ( $K_D$ ) of  $1\ \text{nmol}\cdot\text{L}^{-1}$ <sup>57</sup>, and a  $\text{Ca}^{2+}$  requirement of approximately  $300\ \text{nmol}\cdot\text{L}^{-1}$ <sup>60</sup>. The interaction between PDE1 and  $\text{Ca}^{2+}/\text{CaM}$  was simulated with simple reactions of association/dissociation (Supplementary Figure S11B). The rate constants for these reactions were estimated from the  $K_D$  and based on a slow half-life for the dissociation reaction, which was used to estimate a rate constant of dissociation of ( $k_b$ )  $10^{-3}\ \text{s}^{-1}$ <sup>59</sup>. Consequently, the rate constant for the association of PDE1 with CaM fully

saturated with  $\text{Ca}^{2+}$  was set as  $1 \mu\text{mol}^{-1} \cdot \text{L} \cdot \text{s}^{-1}$ . This rate was kept unchanged for the interaction between PDE1 and CaM partially loaded with  $\text{Ca}^{2+}$ . To simulate the interaction between PDE1 and CaM partially loaded with  $\text{Ca}^{2+}$ , we assumed that the absence of  $\text{Ca}^{2+}$  bound to the  $\text{Ca}^{2+}$ -binding sites located at the N-domain of CaM have a more pronounced effect in the affinity between PDE1 and  $\text{Ca}^{2+}/\text{CaM}$ <sup>54</sup>. Thus, for the interaction of PDE1 with CaM partially loaded with three ions and one vacant  $\text{Ca}^{2+}$ -binding sites at CaM C-terminal, we assumed no change in the affinity between PDE1 and  $\text{Ca}^{2+}/\text{CaM}$ <sup>54</sup>. However, we considered a 10-fold decrease in the affinity of the resulting complex PDE/ $\text{Ca}^{2+}/\text{CaM}$  if a single  $\text{Ca}^{2+}$  was absent from one of the sites located at CaM N-terminal<sup>61</sup>, which was simulated by an increase in the rate for the complex dissociation ( $k_b = 10^{-2} \text{ s}^{-1}$ ). To simulate the interaction between PDE1 and partially loaded CaM with 2 ions absent from its C-terminal, we assumed an increase of 50-fold (50-fold reduction in the affinity) in the rate of dissociation of the complex PDE/ $\text{Ca}^{2+}/\text{CaM}$  ( $k_b = 0.5 \text{ s}^{-1}$ ). For the absence of 2 ions in the CaM N-terminal, we considered an increase in the rate constant for the dissociation of the complex PDE/ $\text{Ca}^{2+}/\text{CaM}$  of 100-fold ( $k_b = 1 \text{ s}^{-1}$ )<sup>61</sup>. The full description of the reactions and parameters are listed in Supplementary Table I (React80-Reac85).

PDE, as well as other CaM targets, modulates the affinity of CaM for  $\text{Ca}^{2+}$ . To incorporate this effect, we recalculated the rate constants for  $\text{Ca}^{2+}$  dissociation from CaM bound to PDE1 considering an overall increase in the affinity of  $\text{Ca}^{2+}$  for CaM in the presence of PDE of 25-fold<sup>62</sup>. No alteration was assumed for the rate constants of association between  $\text{Ca}^{2+}$  and CaM bound to PDE1. Therefore, considering equations (5)-(8) and the values of  $k_I/k_{II}$  ( $0.015 \mu\text{mol}^{-1} \cdot \text{L}$ ),  $k_{III}/k_{IV}$  ( $0.04 \mu\text{mol}^{-1} \cdot \text{L}$ ) for the interaction of  $\text{Ca}^{2+}$  to CaM in absence of PDE1<sup>32</sup>, the values of the microscopic constants of affinity for the binding of  $\text{Ca}^{2+}$  to CaM in presence of PDE1 were calculate as  $k_I/k_{II}$  ( $0.3750 \mu\text{mol}^{-1} \cdot \text{L}$ ),  $k_{III}/k_{IV}$  ( $1 \mu\text{mol}^{-1} \cdot \text{L}$ ). The rate

constants for  $\text{Ca}^{2+}$  association with CaM used in the model were  $k_{f\_I}$  and  $k_{f\_II} = 750 \mu\text{mol}^{-1} \cdot \text{L} \cdot \text{s}^{-1}$ ,  $k_{f\_III} = 800 \mu\text{mol}^{-1} \cdot \text{L} \cdot \text{s}^{-1}$ , and  $k_{f\_IV} = 204 \mu\text{mol}^{-1} \cdot \text{L} \cdot \text{s}^{-1}$  <sup>32</sup> (the terms I, II, III and IV indicate the  $\text{Ca}^{2+}$ -binding sites I, II, III and IV, respectively). With these constants of affinity and the rate constants for the association of  $\text{Ca}^{2+}$  to the complex, the rate constants for the dissociation of  $\text{Ca}^{2+}$ , in absence of cooperativity (only one ion bound to a given domain), from CaM associated to PDE1 were calculated as  $k_{b\_I}$  and  $k_{b\_II} = 2000 \text{ s}^{-1}$ ,  $k_{b\_III} = 800 \text{ s}^{-1}$ , and  $k_{b\_IV} = 204 \text{ s}^{-1}$ . The rate constants for the unbinding of the first ion when two ions are bound to a pair of sites located on given domain of CaM associated to PDE1 were calculated considering the coupling constants  $k_n$  ( $80 \mu\text{mol}^{-1} \cdot \text{L}$ ), and  $k_c$  ( $200 \mu\text{mol}^{-1} \cdot \text{L}$ ):  $k_{b\_I}$  and  $k_{b\_II} = 25 \text{ s}^{-1}$ ,  $k_{b\_III} = 4 \text{ s}^{-1}$ , and  $k_{b\_IV} = 1.02 \text{ s}^{-1}$  (Supplementary Figure S11C, Supplementary Table I: Reac86-Reac92).

### ***cAMP dynamics and PKA***

The balance between PDE1 and AC activity is fundamental to control the intracellular level of cAMP, one of the most important intracellular second messengers. The main target of cAMP is the cAMP-dependent protein kinase (PKA) <sup>63,64</sup>, an enzyme that frequently opposes CaN action. AC produces cAMP with a relative high basal rate<sup>65</sup> that is further accelerated by the rise of  $\text{Ca}^{2+}$  and the formation of  $\text{Ca}^{2+}/\text{CaM}$  <sup>51,55,66,67</sup>. To implement this process, we used the same set of reactions to simulated the production of cAMP by AC in the presence or absence  $\text{Ca}^{2+}/\text{CaM}$ , but assumed that the rate constants of these reactions are speeded by  $\text{Ca}^{2+}/\text{CaM}$  <sup>51,55,66,67</sup>.

In contrast to AC, PDE1 had a low basal activity in our model. The degradation of cAMP catalysed by PDE1 required the presence of  $\text{Ca}^{2+}/\text{CaM}$  <sup>59,68</sup>. In consequence, in addition to the action of PDE1, we used a constant degradation reaction of cAMP to

counteract the basal activity of AC and sustains the basal concentration of cAMP ([cAMP]) around  $100 \text{ nmol.L}^{-1}$ <sup>69</sup>. In neurons, elevations of [cAMP] can reach up to  $3 \text{ } \mu\text{mol.L}^{-1}$ <sup>69</sup>, but require the simultaneous stimulation of AC by  $\text{Ca}^{2+}$ /CaM and protein  $\text{G}_{\alpha\text{s}}$ <sup>66</sup>, which was not implemented in the model. Thus, the rise of  $\text{Ca}^{2+}$  in the model promoted peak elevations of [cAMP] around  $500\text{-}600 \text{ nmol.L}^{-1}$ . The complete description of the reactions and parameters used in the production and degradation of cAMP is listed in Supplementary Table I (Reac93- Reac97).

The rise of [cAMP] in the model regulated the activity of PKA. At rest, PKA is a tetrameric enzyme with two catalytic (C) subunits and a regulatory (R) subunit dimer ( $\text{R}_2$ )<sup>64,70</sup>. This holoenzyme complex kept PKA C subunits in an inactive state in absence of cAMP, which binds to cyclic nucleotide-binding domains (CNB) located in PKA R subunits<sup>64,70</sup>. Structurally, each R subunit contains two tandem CNB domains (CNB-A and CNB-B)<sup>64,70</sup>. The binding of cAMP to the two CNBs in each R subunit promotes a conformational change that leads to the release of the two active C subunits from PKA holoenzyme<sup>64,70</sup>. The R subunits occur in two distinct classes (RI, RII), each having an  $\alpha$  and  $\beta$  isoforms<sup>6,7</sup>.  $\text{RII}\beta$  is the predominant isoform in the brain and the tetramer  $(\text{RII}\beta)_2\text{C}_2$  has the highest cAMP requirement in comparison to other PKA holoenzymes<sup>6,7</sup>.

The crystalized structure of the full-length  $(\text{RII}\beta)_2\text{C}_2$  solved recently indicates that each  $\text{RII}\beta$  subunit of the tetrameric PKA contacts the neighbouring R:C complex<sup>6</sup>. The physical contacts among different subunits in the tetrameric holoenzyme are responsible for PKA allosteric activation<sup>6</sup>. Several groups have developed computational models to simulate PKA activity<sup>71,72</sup>, but most of these models simulated PKA as a dimer of heterodimers, which is not supported by the experimental findings that clearly demonstrate that there is communication between the subunits of the tetrameric PKA during its activation<sup>6,73</sup>. To

simulate PKA, we assumed that it is structurally composed by a dimer of two R subunits  $(\text{RII}\beta)_2$  coupled to two C subunits. The binding/unbinding of each C subunit to a  $\text{RII}\beta$  subunit of the dimer  $(\text{RII}\beta)_2$  was implemented as independent events in the absence of cAMP.

Endogenous PKA is autophosphorylated in the cells, which affects the affinities between the C and  $\text{RII}\beta$  subunits<sup>10</sup>. The phosphorylation of the  $\text{RII}\beta$  subunits by the C subunits was modelled as a first order reaction. PKA is largely in its autophosphorylated state in our model. To simulate the binding/unbinding of each C subunit to the phosphorylated  $\text{RII}\beta$  subunits, we used the same reactions implemented for the non-phosphorylated PKA, but different rate constants<sup>10</sup>.

cAMP can access both the CNB-A and CNB-B of the  $\text{RII}\beta$  subunits in the apoenzyme<sup>7</sup>. In consequence, we simulated the interaction of cAMP to each cAMP-binding site as random and independent events. The affinities and the rate constants observed for the binding/unbinding of cAMP to the isolated  $(\text{RII}\beta)_2$  dimer are different from the parameters reported for the full holoenzyme<sup>74-76</sup>. We assumed that each CNB of the tetrameric PKA has a 3-fold lower affinity for cAMP than the CNBs from the isolated  $(\text{RII}\beta)_2$  dimer<sup>7,76</sup>. The phosphorylation of the  $\text{RII}\beta$  subunits had no effects on their affinities for cAMP.

The binding of two cAMP molecules to each R subunit of the inactive PKA induces a decrease in the affinity between the C and  $\text{RII}\beta$  subunits, which leads to the dissociation of the holoenzyme into two free C subunits and the  $(\text{RII}\beta)_2$  dimer<sup>64,70</sup>. The  $K_D$  for the interaction of the C and  $\text{RII}\beta$  subunit is  $0.14 \text{ nmol.L}^{-1}$  in absence of cAMP, and approximately 15-fold greater in presence of four molecules of cAMP<sup>7</sup>, which we implemented by changing the rate constant for the complex  $(\text{RII}\beta)_2\text{C}_2$  dissociation. The activation of PKA fully saturated with cAMP is highly cooperative ( $n_{\text{Hill}} = 1.7$ ). To capture this property, we assumed that, after the release of the first C subunit from the holoenzyme  $(\text{RII}\beta)_2\text{C}_2$ , the second C subunit

was released with a faster rate constant. This cooperativity was implemented only for PKA fully saturated with cAMP.

Mutations of the CNB-B domain promote a decrease in the  $K_{1/2}$  for PKA activation, which is due mainly to a change in the rate constant ( $k_b$ ) for the dissociation of the complex  $(R\text{II}\beta)_2C_2$ <sup>6,7</sup>. We used this information to define the rate constants for the release of the C subunits from the tetrameric PKA in the absence of cAMP bound to the CNB-B sites: we kept  $k_f$  for the complex association unchanged and multiplied the  $k_b$  by twenty<sup>6,7</sup>. In contrast, mutations in the CNB-A domains promotes a strong increase in the  $K_{1/2}$  for PKA activation<sup>7</sup>, which we took into account to implement the dissociation/association between the C and the R subunits in absence of cAMP bound to the CNB-A sites. The rate constant for this dissociation was defined as the  $k_b$  for the release of the C subunits from the tetramer  $(R\text{II}\beta)_2C_2$  divided by fifth<sup>7</sup>,  $k_f$  was kept unchanged. We simulated the interactions between the C and the phosphorylated RII $\beta$  subunits using the same chemical reactions implemented for the non-phosphorylated RII $\beta$  subunits, but different rate constants<sup>10</sup>.

To validate the thermodynamics properties of the PKA model implemented, we fitted its dose-response curves (equation (1) of the main text) of activation as a function of [cAMP]. Contrarily to the classical view of PKA activation, the release of the C subunits from the  $(R\text{II}\beta)_2$  dimer is only partial even in the presence of high excess of [cAMP]<sup>77,78</sup>. The presence of excess of cAMP in combination with excess of a PKA substrate increases the dissociation of the holoenzyme, but, even under these conditions, the maximum dissociation observed is around 80% of the total amount of PKA<sup>77</sup>. In our model, in absence of substrates, the maximum activation of PKA was around 0.3 (maximum activity was normalized to 1) with a  $n_{\text{Hill}}$  of 1.46 and  $K_{1/2}$  of 0.7  $\mu\text{mol.L}^{-1}$  (Supplementary Figure S9A). We did not find any experimental curve of PKA activation as a function of cAMP in the absence of substrates to

compare with our results. In the presence of the substrate Kemptide (concentration of Kemptide =  $1000 \mu\text{mol.L}^{-1}$  and  $1 \mu\text{mol.L}^{-1}$  of PKA), the maximum PKA activity was approximately 0.8 as observed experimentally<sup>77</sup>. The  $n_{\text{hill}}$  obtained was 1.55 and the  $K_{1/2}$  was  $0.57 \mu\text{mol.L}^{-1}$  (Supplementary Figure S9A). Experimental curves obtained using different concentrations of Kemptide reported  $n_{\text{hill}}$  of 1.7 and  $K_{1/2}$  around  $0.58\text{-}0.6 \mu\text{mol.L}^{-1}$ <sup>6,7</sup>.

To validate the kinetics of the PKA model, we verified the time course for the association of the holoenzyme in absence of cAMP and the time course for its dissociation after the addition of cAMP ( $500 \mu\text{mol.L}^{-1}$  of cAMP and  $1 \mu\text{mol.L}^{-1}$  of PKA) and compared the results with experimental data. For this analysis, we started the simulations with the C subunits fully dissociated from the  $(\text{RII}\beta)_2$  dimers and verified the time course for the formation of the holoenzyme. After 400 s of simulated time, we modelled a release of cAMP to verify the time course of the holoenzyme dissociation. Initially, our model presented a slower time course for the dissociation of the C subunits from PKA in comparison to experimental data. To overcome this problem, we multiplied all the rate constants of dissociation/association of the C subunits from the  $(\text{RII}\beta)_2$  dimers bound to cAMP by two, which resulted in a time course of PKA dissociation very similar to a curve extracted from the experimental literature<sup>8</sup> (Supplementary Figure S9B). This symmetrical alteration promoted no change in the thermodynamics properties of the model. The full description of the reactions and parameters used to simulate the association and dissociation of PKA subunits are listed in the Supplementary Table I (Reac98-Reac120).

### ***Additional model details***

To verify the putative consequences of the different patterns of AC, PDE and, CaN to signalling pathways, we implemented a hypothetical target (termed subs) that act as a

substrate of PKA and, in its phosphorylated state, of CaN. The reactions of phosphorylation and dephosphorylation of the subs by PKA and CaN, respectively, were implemented using exactly the same rate constants, which were based on the rate constants for the phosphorylation of Kemptide by PKA (Supplementary Table I, Reac121).

The simulations began with the the total amount of subs completely phosphorylated. Then, we stimulated the model using 100 glutamate pulses released at 1 Hz and 10 Hz to verified how the combined activity of CaN, AC, PDE1 and PKA regulates the dephosphorylation of subs (Fig. 5G-H).

### *Data Analysis*

We calculated the integral of each single pulse of calcium by the summation of  $[Ca^{2+}]$  amplitudes during the occurrence of the pulse multiplied by  $dt$  that is the time step of the results (1 ms). Then, we plotted the cumulative sum of the integrated calcium pulses ( $Cum.\int[Ca^{2+}].dt$ ) versus the activity of each enzyme for each value of  $V_m$  and frequency of stimulation.

All fittings used a confidence interval of 95% and were calculated with the Matlab toolbox *cftool*. The decay time constants were obtained by fitting the simulated results with a monoexponential or a biexponential function.

The dose-response curves were fitted with the Hill equation described in the main text (equation 1). The concentrations of CaM used during the dose-response curves were in excess and, consequently, should not influence  $K_{1/2}$  and  $n_{Hill}$ . Thus, in this situations,  $Ca^{2+}$  was the only limiting factor. Hippocampal neurons have very high CaM content ( $>20 \mu M^{79,80}$ ). There is a range of estimated values between  $20 \mu M$  to  $100 \mu M$  in the literature. The exact concentration of CaM in dendritic spines is unknown.



## References

1. Feng, B. & Stemmer, P. M. Ca<sup>2+</sup> binding site 2 in calcineurin-B modulates calmodulin-dependent calcineurin phosphatase activity. *Biochemistry (Mosc.)* **40**, 8808–14 (2001).
2. Wittenberg, G. M. & Wang, S. S.-H. Malleability of spike-timing-dependent plasticity at the CA3-CA1 synapse. *J. Neurosci. Off. J. Soc. Neurosci.* **26**, 6610–6617 (2006).
3. Nevian, T. & Sakmann, B. Spine Ca<sup>2+</sup> signaling in spike-timing-dependent plasticity. *J Neurosci* **26**, 11001–13 (2006).
4. Bi, G. & Poo, M. Synaptic modification by correlated activity: Hebb's postulate revisited. *Annu Rev Neurosci* **24**, 139–66 (2001).
5. Gallagher, S. C. *et al.* There is communication between all four Ca(2+)-bindings sites of calcineurin B. *Biochemistry (Mosc.)* **40**, 12094–102 (2001).
6. Zhang, P. *et al.* Structure and allostery of the PKA RIIβ tetrameric holoenzyme. *Science* **335**, 712–6 (2012).
7. Zawadzki, K. M. & Taylor, S. S. cAMP-dependent protein kinase regulatory subunit type IIbeta: active site mutations define an isoform-specific network for allosteric signaling by cAMP. *J Biol Chem* **279**, 7029–36 (2004).
8. Zhang, P. *et al.* Single Turnover Autophosphorylation Cycle of the PKA RIIβ Holoenzyme. *PLOS Biol.* **13**, e1002192 (2015).
9. Clarke, R. J. & Johnson, J. W. Voltage-dependent gating of NR1/2B NMDA receptors. *J Physiol* **586**, 5727–41 (2008).
10. Clarke, R. J., Glasgow, N. G. & Johnson, J. W. Mechanistic and structural determinants of NMDA receptor voltage-dependent gating and slow Mg<sup>2+</sup> unblock. *J Neurosci* **33**, 4140–50 (2013).

11. Erreger, K., Dravid, S. M., Banke, T. G., Wyllie, D. J. & Traynelis, S. F. Subunit-specific gating controls rat NR1/NR2A and NR1/NR2B NMDA channel kinetics and synaptic signalling profiles. *J Physiol* **563**, 345–58 (2005).
12. Paoletti, P., Bellone, C. & Zhou, Q. NMDA receptor subunit diversity: impact on receptor properties, synaptic plasticity and disease. *Nat Rev Neurosci* **14**, 383–400 (2013).
13. Lüscher, C. & Malenka, R. C. NMDA receptor-dependent long-term potentiation and long-term depression (LTP/LTD). *Cold Spring Harb Perspect Biol* **4**, (2012).
14. Henneberger, C., Bard, L., King, C., Jennings, A. & Rusakov, D. A. NMDA receptor activation: two targets for two co-agonists. *Neurochem Res* **38**, 1156–62 (2013).
15. Gray, J. A. *et al.* Distinct modes of AMPA receptor suppression at developing synapses by GluN2A and GluN2B: single-cell NMDA receptor subunit deletion in vivo. *Neuron* **71**, 1085–101 (2011).
16. Bellone, C. & Nicoll, R. A. Rapid bidirectional switching of synaptic NMDA receptors. *Neuron* **55**, 779–85 (2007).
17. Chen, X. *et al.* Organization of the core structure of the postsynaptic density. *Proc Natl Acad Sci U S A* **105**, 4453–8 (2008).
18. Ascher, P. & Nowak, L. The role of divalent cations in the N-methyl-D-aspartate responses of mouse central neurones in culture. *J Physiol* **399**, 247–66 (1988).
19. Banke, T. G. & Traynelis, S. F. Activation of NR1/NR2B NMDA receptors. *Nat Neurosci* **6**, 144–52 (2003).
20. Sabatini, B. L., Oertner, T. G. & Svoboda, K. The life cycle of Ca<sup>2+</sup> ions in dendritic spines. *Neuron* **33**, 439–52 (2002).
21. Schorge, S., Elenes, S. & Colquhoun, D. Maximum likelihood fitting of single channel

- NMDA activity with a mechanism composed of independent dimers of subunits. *J Physiol* **569**, 395–418 (2005).
22. Jahr, C. E. & Stevens, C. F. Calcium permeability of the N-methyl-D-aspartate receptor channel in hippocampal neurons in culture. *Proc Natl Acad Sci U A* **90**, 11573–7 (1993).
  23. Garaschuk, O., Schneggenburger, R., Schirra, C., Tempia, F. & Konnerth, A. Fractional Ca<sup>2+</sup> currents through somatic and dendritic glutamate receptor channels of rat hippocampal CA1 pyramidal neurones. *J Physiol* **491** ( Pt 3), 757–72 (1996).
  24. Kovalchuk, Y., Eilers, J., Lisman, J. & Konnerth, A. NMDA receptor-mediated subthreshold Ca(2+) signals in spines of hippocampal neurons. *J Neurosci* **20**, 1791–9 (2000).
  25. Schneggenburger, R. Simultaneous measurement of Ca<sup>2+</sup> influx and reversal potentials in recombinant N-methyl-D-aspartate receptor channels. *Biophys J* **70**, 2165–74 (1996).
  26. Faeder, J. R., Blinov, M. L. & Hlavacek, W. S. Rule-based modeling of biochemical systems with BioNetGen. *Methods Mol Biol* **500**, 113–67 (2009).
  27. Chin, D. & Means, A. R. Calmodulin: a prototypical calcium sensor. *Trends Cell Biol* **10**, 322–8 (2000).
  28. Xia, Z. & Storm, D. R. The role of calmodulin as a signal integrator for synaptic plasticity. *Nat Rev Neurosci* **6**, 267–76 (2005).
  29. Linse, S., Helmersson, A. & Forsén, S. Calcium binding to calmodulin and its globular domains. *J Biol Chem* **266**, 8050–4 (1991).
  30. Shea, M. A., Verhoeven, A. S. & Pedigo, S. Calcium-induced interactions of calmodulin domains revealed by quantitative thrombin footprinting of Arg37 and Arg106. *Biochemistry (Mosc.)* **35**, 2943–57 (1996).
  31. Boschek, C. B., Squier, T. C. & Bigelow, D. J. Disruption of interdomain interactions

- via partial calcium occupancy of calmodulin. *Biochemistry (Mosc.)* **46**, 4580–8 (2007).
32. Antunes, G., Sebastião, A. M. & Simoes de Souza, F. M. Mechanisms of Regulation of Olfactory Transduction and Adaptation in the Olfactory Cilium. *PLoS One* **9**, e105531 (2014).
  33. Brini, M. & Carafoli, E. Calcium pumps in health and disease. *Physiol Rev* **89**, 1341–78 (2009).
  34. Caride, A. J., Filoteo, A. G., Penniston, J. T. & Strehler, E. E. The plasma membrane Ca<sup>2+</sup> pump isoform 4a differs from isoform 4b in the mechanism of calmodulin binding and activation kinetics: implications for Ca<sup>2+</sup> signaling. *J Biol Chem* **282**, 25640–8 (2007).
  35. Osborn, K. D., Zaidi, A., Mandal, A., Urbauer, R. J. & Johnson, C. K. Single-molecule dynamics of the calcium-dependent activation of plasma-membrane Ca<sup>2+</sup>-ATPase by calmodulin. *Biophys J* **87**, 1892–9 (2004).
  36. Penheiter, A. R., Filoteo, A. G., Penniston, J. T. & Caride, A. J. Kinetic analysis of the calmodulin-binding region of the plasma membrane calcium pump isoform 4b. *Biochemistry (Mosc.)* **44**, 2009–20 (2005).
  37. Slaughter, B. D., Urbauer, R. J., Urbauer, J. L. & Johnson, C. K. Mechanism of calmodulin recognition of the binding domain of isoform 1b of the plasma membrane Ca(2+)-ATPase: kinetic pathway and effects of methionine oxidation. *Biochemistry (Mosc.)* **46**, 4045–54 (2007).
  38. Sun, H. & Squier, T. C. Ordered and cooperative binding of opposing globular domains of calmodulin to the plasma membrane Ca-ATPase. *J Biol Chem* **275**, 1731–8 (2000).
  39. Liyanage, M. R., Zaidi, A. & Johnson, C. K. Fluorescence polarization assay for calmodulin binding to plasma membrane Ca<sup>2+</sup>-ATPase: dependence on enzyme and

- Ca<sup>2+</sup> concentrations. *Anal Biochem* **385**, 1–6 (2009).
40. Stemmer, P. M. & Klee, C. B. Dual calcium ion regulation of calcineurin by calmodulin and calcineurin B. *Biochemistry (Mosc.)* **33**, 6859–66 (1994).
  41. Feng, B. & Stemmer, P. M. Interactions of calcineurin A, calcineurin B, and Ca<sup>2+</sup>. *Biochemistry (Mosc.)* **38**, 12481–9 (1999).
  42. Yang, S. A. & Klee, C. B. Low affinity Ca<sup>2+</sup>-binding sites of calcineurin B mediate conformational changes in calcineurin A. *Biochemistry (Mosc.)* **39**, 16147–54 (2000).
  43. Shen, X. *et al.* The secondary structure of calcineurin regulatory region and conformational change induced by calcium/calmodulin binding. *J Biol Chem* **283**, 11407–13 (2008).
  44. Klee, C. B., Ren, H. & Wang, X. Regulation of the calmodulin-stimulated protein phosphatase, calcineurin. *J Biol Chem* **273**, 13367–70 (1998).
  45. Quintana, A. R., Wang, D., Forbes, J. E. & Waxham, M. N. Kinetics of calmodulin binding to calcineurin. *Biochem Biophys Res Commun* **334**, 674–80 (2005).
  46. O'Donnell, S. E., Yu, L., Fowler, C. A. & Shea, M. A. Recognition of  $\beta$ -calcineurin by the domains of calmodulin: thermodynamic and structural evidence for distinct roles. *Proteins* **79**, 765–86 (2011).
  47. Bayley, P. M., Findlay, W. A. & Martin, S. R. Target recognition by calmodulin: dissecting the kinetics and affinity of interaction using short peptide sequences. *Protein Sci* **5**, 1215–28 (1996).
  48. Brown, S. E., Martin, S. R. & Bayley, P. M. Kinetic control of the dissociation pathway of calmodulin-peptide complexes. *J Biol Chem* **272**, 3389–97 (1997).
  49. Peersen, O. B., Madsen, T. S. & Falke, J. J. Intermolecular tuning of calmodulin by target peptides and proteins: differential effects on Ca<sup>2+</sup> binding and implications for kinase

- activation. *Protein Sci* **6**, 794–807 (1997).
50. Halls, M. L. & Cooper, D. M. Regulation by Ca<sup>2+</sup>-signaling pathways of adenylyl cyclases. *Cold Spring Harb Perspect Biol* **3**, a004143 (2011).
51. Gao, Z. H. *et al.* Activation of four enzymes by two series of calmodulin mutants with point mutations in individual Ca<sup>2+</sup> binding sites. *J Biol Chem* **268**, 20096–104 (1993).
52. Masada, N., Schaks, S., Jackson, S. E., Sinz, A. & Cooper, D. M. Distinct mechanisms of calmodulin binding and regulation of adenylyl cyclases 1 and 8. *Biochemistry (Mosc.)* **51**, 7917–29 (2012).
53. Iqbal, Z. & Sze, P. Y. [125I]calmodulin binding to synaptic plasma membrane from rat brain: kinetic and Arrhenius analysis. *Neurochem Res* **18**, 897–905 (1993).
54. Cooper, D. M. Regulation and organization of adenylyl cyclases and cAMP. *Biochem J* **375**, 517–29 (2003).
55. Guillou, J. L., Nakata, H. & Cooper, D. M. Inhibition by calcium of mammalian adenylyl cyclases. *J Biol Chem* **274**, 35539–45 (1999).
56. Conti, M. & Beavo, J. Biochemistry and physiology of cyclic nucleotide phosphodiesterases: essential components in cyclic nucleotide signaling. *Annu Rev Biochem* **76**, 481–511 (2007).
57. Goraya, T. A. & Cooper, D. M. Ca<sup>2+</sup>-calmodulin-dependent phosphodiesterase (PDE1): current perspectives. *Cell Signal* **17**, 789–97 (2005).
58. Cox, J. A., Malnoë, A. & Stein, E. A. Regulation of brain cyclic nucleotide phosphodiesterase by calmodulin. A quantitative analysis. *J Biol Chem* **256**, 3218–22 (1981).
59. Huang, C. Y., Chau, V., Chock, P. B., Wang, J. H. & Sharma, R. K. Mechanism of activation of cyclic nucleotide phosphodiesterase: requirement of the binding of four

- Ca<sup>2+</sup> to calmodulin for activation. *Proc Natl Acad Sci U A* **78**, 871–4 (1981).
60. Goraya, T. A. *et al.* Kinetic properties of Ca<sup>2+</sup>/calmodulin-dependent phosphodiesterase isoforms dictate intracellular cAMP dynamics in response to elevation of cytosolic Ca<sup>2+</sup>. *Cell Signal* **20**, 359–74 (2008).
61. Zhang, M., Li, M., Wang, J. H. & Vogel, H. J. The effect of Met→Leu mutations on calmodulin's ability to activate cyclic nucleotide phosphodiesterase. *J Biol Chem* **269**, 15546–52 (1994).
62. Olwin, B. B. & Storm, D. R. Calcium binding to complexes of calmodulin and calmodulin binding proteins. *Biochemistry (Mosc.)* **24**, 8081–6 (1985).
63. Cheng, X., Ji, Z., Tsalkova, T. & Mei, F. Epac and PKA: a tale of two intracellular cAMP receptors. *Acta Biochim Biophys Sin Shanghai* **40**, 651–62 (2008).
64. Taylor, S. S., Zhang, P., Steichen, J. M., Keshwani, M. M. & Kornev, A. P. PKA: lessons learned after twenty years. *Biochim Biophys Acta* **1834**, 1271–8 (2013).
65. Ferguson, G. D. & Storm, D. R. Why calcium-stimulated adenylyl cyclases? *Physiol. Bethesda* **19**, 271–6 (2004).
66. Wayman, G. A. *et al.* Synergistic activation of the type I adenylyl cyclase by Ca<sup>2+</sup> and Gs-coupled receptors in vivo. *J. Biol. Chem.* **269**, 25400–25405 (1994).
67. Masada, N., Ciruela, A., Macdougall, D. A. & Cooper, D. M. Distinct mechanisms of regulation by Ca<sup>2+</sup>/calmodulin of type 1 and 8 adenylyl cyclases support their different physiological roles. *J Biol Chem* **284**, 4451–63 (2009).
68. Sharma, R. K. & Kalra, J. Characterization of calmodulin-dependent cyclic nucleotide phosphodiesterase isoenzymes. *Biochem J* **299** ( Pt 1), 97–100 (1994).
69. Mironov, S. L. *et al.* Imaging cytoplasmic cAMP in mouse brainstem neurons. *BMC Neurosci* **10**, 29 (2009).

70. Taylor, S. S., Ilouz, R., Zhang, P. & Kornev, A. P. Assembly of allosteric macromolecular switches: lessons from PKA. *Nat Rev Mol Cell Biol* **13**, 646–58 (2012).
71. Bhalla, U. S. & Iyengar, R. Emergent properties of networks of biological signaling pathways. *Science* **283**, 381–7 (1999).
72. Kotaleski, J. H. & Blackwell, K. T. Modelling the molecular mechanisms of synaptic plasticity using systems biology approaches. *Nat Rev Neurosci* **11**, 239–51 (2010).
73. Byeon, I. J. *et al.* Allosteric communication between cAMP binding sites in the RI subunit of protein kinase A revealed by NMR. *J Biol Chem* **285**, 14062–70 (2010).
74. OGREID, D. & DØSKELAND, S. O. The kinetics of association of cyclic AMP to the two types of binding sites associated with protein kinase II from bovine myocardium. *FEBS Lett* **129**, 287–92 (1981).
75. OGREID, D. & DØSKELAND, S. O. The kinetics of the interaction between cyclic AMP and the regulatory moiety of protein kinase II. Evidence for interaction between the binding sites for cyclic AMP. *FEBS Lett* **129**, 282–6 (1981).
76. Dao, K. K. *et al.* Epac1 and cAMP-dependent protein kinase holoenzyme have similar cAMP affinity, but their cAMP domains have distinct structural features and cyclic nucleotide recognition. *J Biol Chem* **281**, 21500–11 (2006).
77. Trehwella, J. Protein kinase A targeting and activation as seen by small-angle solution scattering. *Eur J Cell Biol* **85**, 655–62 (2006).
78. Vigil, D., Blumenthal, D. K., Brown, S., Taylor, S. S. & Trehwella, J. Differential effects of substrate on type I and type II PKA holoenzyme dissociation. *Biochemistry (Mosc.)* **43**, 5629–36 (2004).
79. Biber, A., Schmid, G. & Hempel, K. Calmodulin content in specific brain areas. *Exp Brain Res* **56**, 323–6 (1984).



80. Kakiuchi, S. *et al.* Quantitative determinations of calmodulin in the supernatant and particulate fractions of mammalian tissues. *J Biochem* **92**, 1041–8 (1982).
81. Clements, J. D., Lester, R. A., Tong, G., Jahr, C. E. & Westbrook, G. L. The time course of glutamate in the synaptic cleft. *Science* **258**, 1498–501 (1992).
82. Moore, M. J., Adams, J. A. & Taylor, S. S. Structural basis for peptide binding in protein kinase A. Role of glutamic acid 203 and tyrosine 204 in the peptide-positioning loop. *J. Biol. Chem.* **278**, 10613–10618 (2003).
83. Lew, J., Taylor, S. S. & Adams, J. A. Identification of a partially rate-determining step in the catalytic mechanism of cAMP-dependent protein kinase: a transient kinetic study using stopped-flow fluorescence spectroscopy. *Biochemistry (Mosc.)* **36**, 6717–6724 (1997).
84. Sims, P. C. *et al.* Electronic Measurements of Single-Molecule Catalysis by cAMP-Dependent Protein Kinase A. *J. Am. Chem. Soc.* **135**, 7861–7868 (2013).

**Supplementary Table I:** Parameters of the model

| <b>Reactions ID</b> | <b>Species/Reactions</b>  | <b>Parameters</b>                       | <b>Notes</b>                                                                                                       | <b>References</b> |
|---------------------|---------------------------|-----------------------------------------|--------------------------------------------------------------------------------------------------------------------|-------------------|
|                     | Volume of the compartment | 0.18e-15 L                              |                                                                                                                    |                   |
|                     | Number of NMDAR           | 20 (13 GluN1/GluN2A and 7 GluN1/GluN2B) |                                                                                                                    | 15–17             |
|                     | Number of PMCA            | 200                                     | This parameter was defined to reproduce the decay time constant of synaptically evoked Ca <sup>2+</sup> transients | This paper        |
|                     | Number of NCX             | 200                                     | This parameter                                                                                                     | This paper        |

|  |                            |                           |                                                                                                     |            |
|--|----------------------------|---------------------------|-----------------------------------------------------------------------------------------------------|------------|
|  |                            |                           | was defined to reproduce the decay time constant of synaptically evoked $\text{Ca}^{2+}$ transients |            |
|  | Number of channels of leak | 12                        | Parameter used to sustain the basal $[\text{Ca}^{2+}]$ .                                            | This paper |
|  | Concentration of CaM       | $40 \mu\text{mol.L}^{-1}$ |                                                                                                     | 79,80      |
|  | Concentration of UB        | $40 \mu\text{mol.L}^{-1}$ | Defined to reproduce a buffer capacity                                                              | This paper |

|       |                                                                             |                                                                                                                                                                                                            |                                                                        |            |
|-------|-----------------------------------------------------------------------------|------------------------------------------------------------------------------------------------------------------------------------------------------------------------------------------------------------|------------------------------------------------------------------------|------------|
|       |                                                                             |                                                                                                                                                                                                            | of 20                                                                  |            |
|       | Concentration of PDE/CaN/AC                                                 | 1 $\mu\text{mol.L}^{-1}$                                                                                                                                                                                   | Equimolar concentration used for comparative analysis                  | This paper |
|       | Basal concentration of cAMP                                                 | $\sim 100 \text{ nmol.L}^{-1}$                                                                                                                                                                             |                                                                        | 69         |
|       | Concentration of PKA                                                        | 1 $\mu\text{mol.L}^{-1}$                                                                                                                                                                                   |                                                                        | This paper |
|       | Concentration of PKA/CaN substrate (subs)                                   | 100 $\mu\text{mol.L}^{-1}$                                                                                                                                                                                 |                                                                        | This paper |
| Reac1 | $\text{Glu} + \text{NMDAR} \xrightleftharpoons[k_b]{2k_f} \text{Glu.NMDAR}$ | $k_{f1(2A)} = 63.2 \mu\text{mol}^{-1}.\text{L}.\text{s}^{-1}$<br>$k_{b1(2A)} = 1010 \text{ s}^{-1}$<br>$k_{f1(2B)} = 5.66 \mu\text{mol}^{-1}.\text{L}.\text{s}^{-1}$<br>$k_{b1(2B)} = 28.1 \text{ s}^{-1}$ | Interaction between glutamate (Glu) and NMDARs, the rate constants are | 9–11       |

|       |                                                                                          |                                                                                                     |                                                                                                                                                             |      |
|-------|------------------------------------------------------------------------------------------|-----------------------------------------------------------------------------------------------------|-------------------------------------------------------------------------------------------------------------------------------------------------------------|------|
|       |                                                                                          |                                                                                                     | <p>given for the two types of NMDARs included in the model.</p> <p>The terms (2A) and (2B) refer to GluN1/GluN2A and GluN1/GluN2B NMDARs, respectively.</p> |      |
| Reac2 | $\text{Glu} + \text{Glu.NMDAR} \xrightleftharpoons[2k_b]{k_f} \text{Glu}_2.\text{NMDAR}$ | $k_{f1(2A)} = 63.2 \mu\text{mol}^{-1}.\text{L}.\text{s}^{-1}$<br>$k_{b1(2A)} = 1010 \text{ s}^{-1}$ |                                                                                                                                                             | 9-11 |

|       |                                                                                                      |                                                                                                                                                 |                                                  |      |
|-------|------------------------------------------------------------------------------------------------------|-------------------------------------------------------------------------------------------------------------------------------------------------|--------------------------------------------------|------|
|       |                                                                                                      | $k_{f1\_2B} = 5.66 \mu\text{mol}^{-1} \cdot \text{L} \cdot \text{s}^{-1}$<br>$k_{b1\_2B} = 28.1 \text{s}^{-1}$                                  |                                                  |      |
| Reac3 | $\text{Glu}_2 \cdot \text{NMDAR} \xrightleftharpoons[k_b]{k_f} \text{Glu}_2 \cdot \text{NMDAR}_{d1}$ | $k_{f2(2A)} = 107 \text{s}^{-1}$<br>$k_{b2(2A)} = 3.5 \text{s}^{-1}$<br>$k_{f2(2B)} = 550 \text{s}^{-1}$<br>$k_{b2(2B)} = 81.4 \text{s}^{-1}$   | The term d1 indicates the desensitized receptor. | 9–11 |
| Reac4 | $\text{Glu}_2 \cdot \text{NMDAR} \xrightleftharpoons[k_b]{k_f} \text{Glu}_2 \cdot \text{NMDAR}_{d2}$ | $k_{f3(2A)} = 46.7 \text{s}^{-1}$<br>$k_{b3(2A)} = 0.41 \text{s}^{-1}$<br>$k_{f3(2B)} = 112 \text{s}^{-1}$<br>$k_{b3(2B)} = 0.91 \text{s}^{-1}$ | The term d2 indicates the desensitized receptor. | 9–11 |
| Reac5 | $\text{Glu}_2 \cdot \text{NMDAR} \xrightleftharpoons[k_b]{k_f} \text{Glu}_2 \cdot \text{NMDAR}_f$    | $k_{f4(2A)} = 3140 \text{s}^{-1}$<br>$k_{b4(2A)} = 174 \text{s}^{-1}$<br>$k_{f4(2B)} = 2836 \text{s}^{-1}$<br>$k_{b4(2B)} = 175 \text{s}^{-1}$  |                                                  | 9–11 |

|       |                                                                            |                                                                                                                                                                                      |                                         |      |
|-------|----------------------------------------------------------------------------|--------------------------------------------------------------------------------------------------------------------------------------------------------------------------------------|-----------------------------------------|------|
| Reac6 | $Glu_2.NMDAR \xrightleftharpoons[k_b]{k_f} Glu_2.NMDAR_s$                  | $k_{f5(2A)} = 230 \exp\left(\frac{V_m - 100}{175}\right) s^{-1}$ $k_{b5(2A)} = 178 s^{-1}$ $k_{f5(2B)} = 48 \exp\left(\frac{V_m - 100}{175}\right) s^{-1}$ $k_{b5(2B)} = 230 s^{-1}$ |                                         | 9,10 |
| Reac7 | $Glu_2.NMDAR_f \xrightleftharpoons[k_b]{k_f} Glu_2.NMDAR_o$                | $k_{f5(2A)} = 230 \exp\left(\frac{V_m - 100}{175}\right) s^{-1}$ $k_{b5(2A)} = 178 s^{-1}$ $k_{f5(2B)} = 48 \exp\left(\frac{V_m - 100}{175}\right) s^{-1}$ $k_{b5(2B)} = 230 s^{-1}$ | The term O indicates the open receptor. | 9,10 |
| Reac8 | $Glu_2.NMDAR_s \xrightleftharpoons[k_b]{k_f} Glu_2.NMDAR_o$                | $k_{f4(2A)} = 3140 s^{-1}$ $k_{b4(2A)} = 174 s^{-1}$ $k_{f4(2B)} = 2836 s^{-1}$ $k_{b4(2B)} = 175 s^{-1}$                                                                            |                                         | 9-11 |
| Reac9 | $Glu_2.NMDAR_o \xrightleftharpoons[k_b(V_m)]{k_f(V_m)} Glu_2.NMDAR_o^{Mg}$ | $k_{f(V_m)} = 610 \exp\left(\frac{-V_m}{17}\right) [Mg^{2+}] s^{-1}$ $[Mg^{2+}] = 1 \text{ mmol.L}^{-1}$                                                                             |                                         | 18   |

|        |                                                                        |                                                                                                                                                                                                                                    |                                                                 |      |
|--------|------------------------------------------------------------------------|------------------------------------------------------------------------------------------------------------------------------------------------------------------------------------------------------------------------------------|-----------------------------------------------------------------|------|
|        |                                                                        | $k_{b(V_m)} = 5400 \exp\left(\frac{V_m}{47}\right) s^{-1}$                                                                                                                                                                         |                                                                 |      |
| Reac10 | $Glu + NMDAR^{Mg} \xrightleftharpoons[k_b]{2k_f} Glu.NMDAR^{Mg}$       | $k_{f1(2A)} = 63.2 \mu\text{mol}^{-1} \cdot \text{L} \cdot \text{s}^{-1}$<br>$k_{b1(2A)} = 1010 \text{ s}^{-1}$<br>$k_{f1(2B)} = 5.66 \mu\text{mol}^{-1} \cdot \text{L} \cdot \text{s}^{-1}$<br>$k_{b1(2B)} = 38.1 \text{ s}^{-1}$ | NMDAR<br>blocked by $\text{Mg}^{2+}$<br>( $\text{NMDAR}^{Mg}$ ) | 9-11 |
| Reac11 | $Glu + Glu.NMDAR^{Mg} \xrightleftharpoons[2k_b]{k_f} Glu_2.NMDAR^{Mg}$ | $k_{f1(2A)} = 63.2 \mu\text{mol}^{-1} \cdot \text{L} \cdot \text{s}^{-1}$<br>$k_{b1(2A)} = 1010 \text{ s}^{-1}$<br>$k_{f1(2B)} = 5.66 \mu\text{mol}^{-1} \cdot \text{L} \cdot \text{s}^{-1}$<br>$k_{b1(2B)} = 38.1 \text{ s}^{-1}$ |                                                                 | 9-11 |
| Reac12 | $Glu_2.NMDAR^{Mg} \xrightleftharpoons[k_b]{k_f} Glu_2.NMDAR_{d1}^{Mg}$ | $k_{f2(2A)} = 107 \text{ s}^{-1}$<br>$k_{b2(2A)} = 3.5 \text{ s}^{-1}$<br>$k_{f2(2B)} = 550 \text{ s}^{-1}$<br>$k_{b2(2B)} = 81.4 \text{ s}^{-1}$                                                                                  |                                                                 | 9-11 |
| Reac13 | $Glu_2.NMDAR \xrightleftharpoons[k_b]{k_f} Glu_2.NMDAR_{d2}^{Mg}$      | $k_{f3(2A)} = 46.7 \text{ s}^{-1}$                                                                                                                                                                                                 |                                                                 | 9-11 |



|        |                                                                                                                 |                                                                                                                                                                                                                               |  |      |
|--------|-----------------------------------------------------------------------------------------------------------------|-------------------------------------------------------------------------------------------------------------------------------------------------------------------------------------------------------------------------------|--|------|
|        |                                                                                                                 | $k_{b3(2A)} = 0.41 \text{ s}^{-1}$<br>$k_{f3(2B)} = 112 \text{ s}^{-1}$<br>$k_{b3(2B)} = 0.91 \text{ s}^{-1}$                                                                                                                 |  |      |
| Reac14 | $\text{Glu}_2.\text{NMDAR} \xrightleftharpoons[k_b]{k_f} \text{Glu}_2.\text{NMDAR}_f^{\text{Mg}}$               | $k_{f4(2A)} = 3140 \text{ s}^{-1}$<br>$k_{b4(2A)} = 174 \text{ s}^{-1}$<br>$k_{f4(2B)} = 2836 \text{ s}^{-1}$<br>$k_{b4(2B)} = 175 \text{ s}^{-1}$                                                                            |  | 9-11 |
| Reac15 | $\text{Glu}_2.\text{NMDAR} \xrightleftharpoons[k_b]{k_f} \text{Glu}_2.\text{NMDAR}_s^{\text{Mg}}$               | $k_{f5(2A)} = 230 \exp\left(\frac{V_m - 100}{175}\right) \text{ s}^{-1}$<br>$k_{b5(2A)} = 178 \text{ s}^{-1}$<br>$k_{f5(2B)} = 48 \exp\left(\frac{V_m - 100}{175}\right) \text{ s}^{-1}$<br>$k_{b5(2B)} = 230 \text{ s}^{-1}$ |  | 9,10 |
| Reac16 | $\text{Glu}_2.\text{NMDAR}_f^{\text{Mg}} \xrightleftharpoons[k_b]{k_f} \text{Glu}_2.\text{NMDAR}_o^{\text{Mg}}$ | $k_{f5(2A)} = 230 \exp\left(\frac{V_m - 100}{175}\right) \text{ s}^{-1}$<br>$k_{b5(2A)} = 178 \text{ s}^{-1}$<br>$k_{f5(2B)} = 48 \exp\left(\frac{V_m - 100}{175}\right) \text{ s}^{-1}$                                      |  | 9,10 |

|        |                                                                           |                                                                                                                                                    |                                                                                             |            |
|--------|---------------------------------------------------------------------------|----------------------------------------------------------------------------------------------------------------------------------------------------|---------------------------------------------------------------------------------------------|------------|
|        |                                                                           | $k_{b5(2B)} = 230 \text{ s}^{-1}$                                                                                                                  |                                                                                             |            |
| Reac17 | $Glu_2.NMDAR_s^{Mg} \xrightleftharpoons[k_b]{k_f} Glu_2.NMDAR_o^{Mg}$     | $k_{f4(2A)} = 3140 \text{ s}^{-1}$<br>$k_{b4(2A)} = 174 \text{ s}^{-1}$<br>$k_{f4(2B)} = 2836 \text{ s}^{-1}$<br>$k_{b4(2B)} = 175 \text{ s}^{-1}$ |                                                                                             | 9-11       |
| Reac18 | $Glu \xrightarrow{k_f} Glu_{\text{degrad}}$                               | $k_f = 833 \text{ s}^{-1}$                                                                                                                         | Glutamate degradation                                                                       | 81         |
| Reac19 | $Ca^{2+} + UB \xrightleftharpoons[k_b]{k_f} (Ca^{2+})UB$                  | $k_f = 10 \mu\text{mol}^{-1}.\text{L}.\text{s}^{-1}$<br>$k_b = 100 \text{ s}^{-1}$                                                                 | Interaction of $Ca^{2+}$ with UB.                                                           | This paper |
| Reac20 | $Ca^{2+} + CaM_{I,II} \xrightleftharpoons[k_b]{k_f} (Ca^{2+})_I.CaM_{II}$ | $k_f = 750 \mu\text{mol}^{-1}.\text{L}.\text{s}^{-1}$<br>$k_b = 50000 \text{ s}^{-1}$                                                              | Reversible formation of the complex CaM with $Ca^{2+}$ associated to the $Ca^{2+}$ -binding | 32         |

|  |  |  |                                                                                                                                                                                                                                                                                                               |  |
|--|--|--|---------------------------------------------------------------------------------------------------------------------------------------------------------------------------------------------------------------------------------------------------------------------------------------------------------------|--|
|  |  |  | <p>site I, located in the N-terminal of CaM, while the Ca<sup>2+</sup>-binding site II is empty. For the reactions of interaction between CaM and Ca<sup>2+</sup>, in the notation (Ca<sup>2+</sup>)<sub>x</sub>CaM<sub>y</sub>, the terms x and y indicate the Ca<sup>2+</sup>-binding sites filled with</p> |  |
|--|--|--|---------------------------------------------------------------------------------------------------------------------------------------------------------------------------------------------------------------------------------------------------------------------------------------------------------------|--|

|  |  |  |                                                                                                                                                                                                                                                          |  |
|--|--|--|----------------------------------------------------------------------------------------------------------------------------------------------------------------------------------------------------------------------------------------------------------|--|
|  |  |  | <p>Ca<sup>2+</sup> and empty, respectively.</p> <p>Sites that were not mentioned explicitly indicated that their state (filled with Ca<sup>2+</sup> or empty) do not interfere with the reactions been described. See the documentation of BioNetGen</p> |  |
|--|--|--|----------------------------------------------------------------------------------------------------------------------------------------------------------------------------------------------------------------------------------------------------------|--|

|        |                                                                                 |                                                                                                   |                                                                                                                                                                          |               |
|--------|---------------------------------------------------------------------------------|---------------------------------------------------------------------------------------------------|--------------------------------------------------------------------------------------------------------------------------------------------------------------------------|---------------|
|        |                                                                                 |                                                                                                   | for further information on rule-based modelling <sup>26</sup> .                                                                                                          |               |
| Reac21 | $Ca^{2+} + CaM_{I,II} \xrightleftharpoons[k_b]{k_f} (Ca^{2+})_{II} \cdot CaM_I$ | $k_f = 750 \mu\text{mol}^{-1} \cdot \text{L} \cdot \text{s}^{-1}$<br>$k_b = 50000 \text{ s}^{-1}$ | Reversible formation of the complex CaM with $Ca^{2+}$ associated to the $Ca^{2+}$ -binding site II, located in CaM N-terminal with the $Ca^{2+}$ -binding site I empty. | <sup>32</sup> |

|        |                                                                                     |                                                                                         |                                                                                                                                                                                                                     |    |
|--------|-------------------------------------------------------------------------------------|-----------------------------------------------------------------------------------------|---------------------------------------------------------------------------------------------------------------------------------------------------------------------------------------------------------------------|----|
| Reac22 | $Ca^{2+} + (Ca^{2+})_I.CaM_{II} \xrightleftharpoons[k_b]{k_f} (Ca^{2+})_{I,II}.CaM$ | $k_f = 750 \mu\text{mol}^{-1}.\text{L}.\text{s}^{-1}$<br><br>$k_b = 625 \text{ s}^{-1}$ | Reversible<br><br>formation of the<br>complex CaM<br>with $Ca^{2+}$<br>associated to the<br>$Ca^{2+}$ -binding<br>site II, located in<br>the N-terminal<br>of CaM, with the<br>$Ca^{2+}$ -binding<br>site I filled. | 32 |
| Reac23 | $Ca^{2+} + (Ca^{2+})_{II}.CaM_I \xrightleftharpoons[k_b]{k_f} (Ca^{2+})_{I,II}.CaM$ | $k_f = 750 \mu\text{mol}^{-1}.\text{L}.\text{s}^{-1}$<br><br>$k_b = 625 \text{ s}^{-1}$ | Reversible<br><br>formation of the<br>complex CaM<br>with $Ca^{2+}$                                                                                                                                                 | 32 |

|        |                                                                                 |                                                                                                   |                                                                                                                                               |  |
|--------|---------------------------------------------------------------------------------|---------------------------------------------------------------------------------------------------|-----------------------------------------------------------------------------------------------------------------------------------------------|--|
|        |                                                                                 |                                                                                                   | associated to the Ca <sup>2+</sup> -binding site I, located in the N-terminal, with the Ca <sup>2+</sup> -binding site II filled.             |  |
| Reac24 | $Ca^{2+} + CaM_{III,IV} \xrightleftharpoons[k_b]{k_f} (Ca^{2+})_{III}.CaM_{IV}$ | $k_f = 800 \mu\text{mol}^{-1} \cdot \text{L} \cdot \text{s}^{-1}$<br>$k_b = 20000 \text{ s}^{-1}$ | Reversible formation of the complex CaM with Ca <sup>2+</sup> associated to the Ca <sup>2+</sup> -binding site III, located in the C-terminal |  |

|        |                                                                                           |                                                                                        |                                                                                                                                                                      |    |
|--------|-------------------------------------------------------------------------------------------|----------------------------------------------------------------------------------------|----------------------------------------------------------------------------------------------------------------------------------------------------------------------|----|
|        |                                                                                           |                                                                                        | of CaM, with the Ca <sup>2+</sup> -binding site IV empty.                                                                                                            |    |
| Reac25 | $Ca^{2+} + CaM_{III,IV} \xrightleftharpoons[k_b]{k_f} (Ca^{2+})_{IV}.CaM_{III}$           | $k_f = 204 \mu\text{mol}^{-1}.\text{L}.\text{s}^{-1}$<br>$k_b = 5115 \text{ s}^{-1}$   | Reversible formation of the complex CaM with Ca <sup>2+</sup> associated to the Ca <sup>2+</sup> -binding site IV with the Ca <sup>2+</sup> -binding site III empty. | 32 |
| Reac26 | $Ca^{2+} + (Ca^{2+})_{III}.CaM_{IV} \xrightleftharpoons[k_b]{k_f} (Ca^{2+})_{III,IV}.CaM$ | $k_f = 204 \mu\text{mol}^{-1}.\text{L}.\text{s}^{-1}$<br>$k_b = 25.575 \text{ s}^{-1}$ | Reversible formation of the complex CaM                                                                                                                              | 32 |



|        |                                                                                                                                                               |                                                                                                 |                                                                                                                                                                                                        |    |
|--------|---------------------------------------------------------------------------------------------------------------------------------------------------------------|-------------------------------------------------------------------------------------------------|--------------------------------------------------------------------------------------------------------------------------------------------------------------------------------------------------------|----|
|        |                                                                                                                                                               |                                                                                                 | with $\text{Ca}^{2+}$<br>associated to the<br>$\text{Ca}^{2+}$ -binding<br>site IV with the<br>$\text{Ca}^{2+}$ -binding<br>site III filled.                                                           |    |
| Reac27 | $\text{Ca}^{2+} + (\text{Ca}^{2+})_{\text{IV}} \cdot \text{CaM}_{\text{III}} \xrightleftharpoons[k_b]{k_f} (\text{Ca}^{2+})_{\text{III,IV}} \cdot \text{CaM}$ | $k_f = 800 \mu\text{mol}^{-1} \cdot \text{L} \cdot \text{s}^{-1}$<br>$k_b = 100 \text{ s}^{-1}$ | Reversible<br>formation of the<br>complex $\text{CaM}$<br>with $\text{Ca}^{2+}$<br>associated to the<br>$\text{Ca}^{2+}$ -binding<br>site III with the<br>$\text{Ca}^{2+}$ -binding<br>site IV filled. | 32 |

|        |                                                                                                         |                                                                                                                                                                        |                                                                                                                                                                                            |          |
|--------|---------------------------------------------------------------------------------------------------------|------------------------------------------------------------------------------------------------------------------------------------------------------------------------|--------------------------------------------------------------------------------------------------------------------------------------------------------------------------------------------|----------|
| Reac28 | $Ca^{2+} + PMCA \xrightleftharpoons[k_b]{k_f} (Ca^{2+})PMCA$ $(Ca^{2+})PMCA \xrightarrow{k_{cat}} PMCA$ | $k_f = 55 \mu\text{mol}^{-1} \cdot \text{L} \cdot \text{s}^{-1}$<br>$k_b = 250 \text{ s}^{-1}$<br>$k_{cat} = 30 \mu\text{mol} \cdot \text{L}^{-1} \cdot \text{s}^{-1}$ | Basal rate of $Ca^{2+}$ efflux through PMCA.                                                                                                                                               | 33,34    |
| Reac29 | $PMCA + (Ca^{2+})_C \cdot CaM \xrightleftharpoons[k_b]{k_f} PMCA \cdot (Ca^{2+})_C \cdot CaM$           | $k_f = 0.2 \mu\text{mol}^{-1} \cdot \text{L} \cdot \text{s}^{-1}$<br>$k_b = 0.002 \text{ s}^{-1}$                                                                      | Interaction between PMCA and CaM associated to $Ca^{2+}$ (one or two ions) only in the $Ca^{2+}$ -binding sites located at its C-terminal, indicated by the term $(Ca^{2+})_C \cdot CaM$ . | 34,38,39 |

|        |                                                                                                                                                                                                                                                       |                                                                                                                                                                        |                                                                                                                              |          |
|--------|-------------------------------------------------------------------------------------------------------------------------------------------------------------------------------------------------------------------------------------------------------|------------------------------------------------------------------------------------------------------------------------------------------------------------------------|------------------------------------------------------------------------------------------------------------------------------|----------|
| Reac30 | $PMCA + (Ca^{2+})_{N,C} \cdot CaM \xrightleftharpoons[k_b]{k_f} PMCA \cdot (Ca^{2+})_{N,C} \cdot CaM$                                                                                                                                                 | $k_f = 0.2 \mu\text{mol}^{-1} \cdot \text{L} \cdot \text{s}^{-1}$<br>$k_b = 0.0012 \text{ s}^{-1}$                                                                     | Interaction between PMCA and CaM associated to three or four $Ca^{2+}$ , indicated by the term $(Ca^{2+})_{N,C} \cdot CaM$ . | 34,38,39 |
| Reac31 | $Ca^{2+} + (Ca^{2+})_C \cdot CaM \cdot PMCA \xrightleftharpoons[k_b]{k_f} (Ca^{2+}) \cdot (Ca^{2+})_C \cdot CaM \cdot PMCA$ $(Ca^{2+}) \cdot (Ca^{2+})_C \cdot CaM \cdot PMCA \xrightarrow{k_{cat}} (Ca^{2+})_C \cdot CaM \cdot PMCA$                 | $k_f = 55 \mu\text{mol}^{-1} \cdot \text{L} \cdot \text{s}^{-1}$<br>$k_b = 250 \text{ s}^{-1}$<br>$k_{cat} = 30 \mu\text{mol} \cdot \text{L}^{-1} \cdot \text{s}^{-1}$ | $Ca^{2+}$ efflux                                                                                                             | 33,34    |
| Reac32 | $Ca^{2+} + (Ca^{2+})_{N,C} \cdot CaM \cdot PMCA \xrightleftharpoons[k_b]{k_f} (Ca^{2+}) \cdot (Ca^{2+})_{N,C} \cdot CaM \cdot PMCA$ $(Ca^{2+}) \cdot (Ca^{2+})_{N,C} \cdot CaM \cdot PMCA \xrightarrow{k_{cat}} (Ca^{2+})_{N,C} \cdot CaM \cdot PMCA$ | $k_f = 50 \mu\text{mol}^{-1} \cdot \text{L} \cdot \text{s}^{-1}$<br>$k_b = 7.5 \text{ s}^{-1}$<br>$k_{cat} = 30 \mu\text{mol} \cdot \text{L}^{-1} \cdot \text{s}^{-1}$ | $Ca^{2+}$ efflux                                                                                                             | 33,34    |
| Reac33 | $Ca^{2+} + (Ca^{2+})_C \cdot CaM_{I,II} \cdot PMCA \xrightleftharpoons[k_b]{k_f} (Ca^{2+})_{I,C} \cdot CaM_{II} \cdot PMCA$                                                                                                                           | $k_f = 750 \mu\text{mol}^{-1} \cdot \text{L} \cdot \text{s}^{-1}$                                                                                                      | Binding of $Ca^{2+}$                                                                                                         | 32,34,49 |

|  |  |                              |                                                                                                                                                                                                                                                                                                                                                                                                                                 |  |
|--|--|------------------------------|---------------------------------------------------------------------------------------------------------------------------------------------------------------------------------------------------------------------------------------------------------------------------------------------------------------------------------------------------------------------------------------------------------------------------------|--|
|  |  | $k_b = 12500 \text{ s}^{-1}$ | <p>to CaM<br/> associated to<br/> PMCA. The<br/> term<br/> <math>(\text{Ca}^{2+})_C \cdot \text{CaM}_{I,II}</math><br/> indicates the<br/> presence of <math>\text{Ca}^{2+}</math><br/> (one or two ions)<br/> bound to the<br/> <math>\text{Ca}^{2+}</math>-binding<br/> sites of the C-<br/> terminal, with no<br/> <math>\text{Ca}^{2+}</math> associated<br/> to the <math>\text{Ca}^{2+}</math>-<br/> binding sites of</p> |  |
|--|--|------------------------------|---------------------------------------------------------------------------------------------------------------------------------------------------------------------------------------------------------------------------------------------------------------------------------------------------------------------------------------------------------------------------------------------------------------------------------|--|

|        |                                                                                                                             |                                                                                                   |                                                                         |          |
|--------|-----------------------------------------------------------------------------------------------------------------------------|---------------------------------------------------------------------------------------------------|-------------------------------------------------------------------------|----------|
|        |                                                                                                                             |                                                                                                   | the N-terminal.                                                         |          |
| Reac34 | $Ca^{2+} + (Ca^{2+})_C \cdot CaM_{I,II} \cdot PMCA \xrightleftharpoons[k_b]{k_f} (Ca^{2+})_{II,C} \cdot CaM_I \cdot PMCA$   | $k_f = 750 \mu\text{mol}^{-1} \cdot \text{L} \cdot \text{s}^{-1}$<br>$k_b = 12500 \text{ s}^{-1}$ | Binding of $Ca^{2+}$<br>to CaM<br>associated to<br>PMCA.                | 32,34,49 |
| Reac35 | $Ca^{2+} + (Ca^{2+})_{I,C} \cdot CaM_{II} \cdot PMCA \xrightleftharpoons[k_b]{k_f} (Ca^{2+})_{I,II,C} \cdot CaM \cdot PMCA$ | $k_f = 750 \mu\text{mol}^{-1} \cdot \text{L} \cdot \text{s}^{-1}$<br>$k_b = 162.5 \text{ s}^{-1}$ | Cooperative<br>binding of $Ca^{2+}$<br>to CaM<br>associated to<br>PMCA. | 32,34,49 |
| Reac36 | $Ca^{2+} + (Ca^{2+})_{II,C} \cdot CaM_I \cdot PMCA \xrightleftharpoons[k_b]{k_f} (Ca^{2+})_{I,II,C} \cdot CaM \cdot PMCA$   | $k_f = 750 \mu\text{mol}^{-1} \cdot \text{L} \cdot \text{s}^{-1}$<br>$k_b = 162.5 \text{ s}^{-1}$ | Cooperative<br>binding of $Ca^{2+}$<br>to CaM<br>associated to<br>PMCA. | 32,34,49 |

|        |                                                                                                     |                                                                                         |                                                                                                |          |
|--------|-----------------------------------------------------------------------------------------------------|-----------------------------------------------------------------------------------------|------------------------------------------------------------------------------------------------|----------|
| Reac37 | $Ca^{2+} + (Ca^{2+})_{III}.CaM_{IV}.PMCA \xrightleftharpoons[k_b]{k_f} (Ca^{2+})_{III,IV}.CaM.PMCA$ | $k_f = 204 \mu\text{mol}^{-1}.\text{L}.\text{s}^{-1}$<br>$k_b = 6.39375 \text{ s}^{-1}$ | Cooperative binding of $Ca^{2+}$ to the $Ca^{2+}$ -binding site IV of CaM associated to PMCA.  | 32,34,49 |
| Reac38 | $Ca^{2+} + (Ca^{2+})_{IV}.CaM_{III}.PMCA \xrightleftharpoons[k_b]{k_f} (Ca^{2+})_{III,IV}.CaM.PMCA$ | $k_f = 800 \mu\text{mol}^{-1}.\text{L}.\text{s}^{-1}$<br>$k_b = 25 \text{ s}^{-1}$      | Cooperative binding of $Ca^{2+}$ to the $Ca^{2+}$ -binding site III of CaM associated to PMCA. | 32,34,49 |

|        |                                                                                                     |                                                                                                                                    |                                                                                                                           |            |
|--------|-----------------------------------------------------------------------------------------------------|------------------------------------------------------------------------------------------------------------------------------------|---------------------------------------------------------------------------------------------------------------------------|------------|
| Reac39 | $Ca^{2+} + NCX \xrightleftharpoons[k_b]{k_f} (Ca^{2+})NCX$ $(Ca^{2+})NCX \xrightarrow{k_{cat}} NCX$ | $k_f = 250 \mu\text{mol}^{-1} \cdot \text{L} \cdot \text{s}^{-1}$<br>$k_b = 100 \text{ s}^{-1}$<br>$k_{cat} = 2400 \text{ s}^{-1}$ | Non-conservative<br>efflux of $Ca^{2+}$<br>from the cytosol<br>catalyzed by<br>NCX.                                       | 32         |
| Reac40 | $leak \xrightarrow{k_{leak}} leak + Ca^{2+}$                                                        | $k_{leak} = 400 \mu\text{mol}^{-1} \cdot \text{L} \cdot \text{s}^{-1}$                                                             | First order<br>reaction of a<br>constant leak of<br>$Ca^{2+}$ to the<br>cytosol to<br>sustain the basal<br>[ $Ca^{2+}$ ]. | This paper |
| Reac41 | $Ca^{2+} + CNB_{I,II} \xrightleftharpoons[k_b]{k_f} (Ca^{2+})_I \cdot CNB_{II}$                     | $k_f = 6.4 \mu\text{mol}^{-1} \cdot \text{L} \cdot \text{s}^{-1}$<br>$k_b = 0.03 \text{ s}^{-1}$                                   | Reversible<br>interaction                                                                                                 | 5,41       |

|  |  |  |                                                                                                                                                                                                                                                                                                                                                                       |  |
|--|--|--|-----------------------------------------------------------------------------------------------------------------------------------------------------------------------------------------------------------------------------------------------------------------------------------------------------------------------------------------------------------------------|--|
|  |  |  | <p>between <math>\text{Ca}^{2+}</math> and the subunit CNB of CaN. The term I, II, III and IV denote the <math>\text{Ca}^{2+}</math>-binding sites of CNB. In the notation <math>(\text{Ca}^{2+})_x\text{CNB}_y</math>, the terms x and y indicate the <math>\text{Ca}^{2+}</math>-binding sites filled with <math>\text{Ca}^{2+}</math> and empty, respectively.</p> |  |
|--|--|--|-----------------------------------------------------------------------------------------------------------------------------------------------------------------------------------------------------------------------------------------------------------------------------------------------------------------------------------------------------------------------|--|



|        |                                                                                     |                                                                                                    |                                                                                                                                                                                              |      |
|--------|-------------------------------------------------------------------------------------|----------------------------------------------------------------------------------------------------|----------------------------------------------------------------------------------------------------------------------------------------------------------------------------------------------|------|
|        |                                                                                     |                                                                                                    | The interaction of $Ca^{2+}$ to the $Ca^{2+}$ - binding sites located at each terminal of CNB was considered independent of the state of the $Ca^{2+}$ -binding sites of the other terminal. |      |
| Reac42 | $Ca^{2+} + (Ca^{2+})_I.CNB_{II} \xrightleftharpoons[k_b]{k_f} (Ca^{2+})_{I,II}.CNB$ | $k_f = 6.4 \mu\text{mol}^{-1} \cdot \text{L} \cdot \text{s}^{-1}$<br>$k_b = 0.0018 \text{ s}^{-1}$ |                                                                                                                                                                                              | 5,41 |
| Reac43 | $Ca^{2+} + CNB_{III,IV} \xrightleftharpoons[k_b]{k_f} (Ca^{2+})_{III}.CNB_{IV}$     | $k_f = 0.09 \mu\text{mol}^{-1} \cdot \text{L} \cdot \text{s}^{-1}$                                 |                                                                                                                                                                                              | 5,41 |

|        |                                                                                           |                                                                                        |                                                                                                                                                                                      |      |
|--------|-------------------------------------------------------------------------------------------|----------------------------------------------------------------------------------------|--------------------------------------------------------------------------------------------------------------------------------------------------------------------------------------|------|
|        |                                                                                           | $k_b = 0.05 \text{ s}^{-1}$                                                            |                                                                                                                                                                                      |      |
| Reac44 | $Ca^{2+} + (Ca^{2+})_{III}.CNB_{IV} \xrightleftharpoons[k_b]{k_f} (Ca^{2+})_{III,IV}.CNB$ | $k_f = 0.09 \mu\text{mol}^{-1}.\text{L}.\text{s}^{-1}$<br>$k_b = 0.025 \text{ s}^{-1}$ |                                                                                                                                                                                      | 5,41 |
| Reac45 | $CNA + (Ca^{2+})_{N,C}.CaM \xrightleftharpoons[k_b]{k_f} (Ca^{2+})_{N,C}.CaM.CNA$         | $k_f = 46 \mu\text{mol}^{-1}.\text{L}.\text{s}^{-1}$<br>$k_b = 0.0012 \text{ s}^{-1}$  | Interaction between the subunit CNA of CaN with CaM associated to at least one $Ca^{2+}$ bound to each one of its globular domain. The notation $(Ca^{2+})_{N,C}.CaM$ indicated that | 45   |

|        |                                                                                                                                       |                                                                                               |                                                                                                                                                                        |       |
|--------|---------------------------------------------------------------------------------------------------------------------------------------|-----------------------------------------------------------------------------------------------|------------------------------------------------------------------------------------------------------------------------------------------------------------------------|-------|
|        |                                                                                                                                       |                                                                                               | both the C and the N-terminal domain of CaM have $\text{Ca}^{2+}$ associated to it.                                                                                    |       |
| Reac46 | $\text{CNA} + (\text{Ca}^{2+})_C \cdot \text{CaM} \xrightleftharpoons[k_b]{k_f} (\text{Ca}^{2+})_C \cdot \text{CaM} \cdot \text{CNA}$ | $k_f = 46 \mu\text{mol}^{-1} \cdot \text{L} \cdot \text{s}^{-1}$<br>$k_b = 46 \text{ s}^{-1}$ | Interaction between the subunit CNA of CaN with CaM associated to $\text{Ca}^{2+}$ (one or two ions) to the $\text{Ca}^{2+}$ -binding sites located in its C-terminal. | 45,46 |

|        |                                                                                                     |                                                                                                     |                                                                                                                                                          |       |
|--------|-----------------------------------------------------------------------------------------------------|-----------------------------------------------------------------------------------------------------|----------------------------------------------------------------------------------------------------------------------------------------------------------|-------|
| Reac47 | $CNA + (Ca^{2+})_N \cdot CaM \xrightleftharpoons[k_b]{k_f} (Ca^{2+})_N \cdot CaM \cdot CNA$         | $k_f = 46 \mu\text{mol}^{-1} \cdot \text{L} \cdot \text{s}^{-1}$<br><br>$k_b = 322 \text{ s}^{-1}$  | Interaction between the subunit CNA of CaN with CaM associated to $Ca^{2+}$ (one or two ions) in the $Ca^{2+}$ -binding sites located in its N-terminal. | 45,46 |
| Reac48 | $Ca^{2+} + CaM_{I,II} \cdot CNA \xrightleftharpoons[k_b]{k_f} (Ca^{2+})_I \cdot CaM_{II} \cdot CNA$ | $k_f = 750 \mu\text{mol}^{-1} \cdot \text{L} \cdot \text{s}^{-1}$<br><br>$k_b = 950 \text{ s}^{-1}$ | Reversible interaction of the complex CaM associated to the subunit CNA of                                                                               | 32,46 |

|        |                                                                                             |                                                                                      |                                                                                                                       |       |
|--------|---------------------------------------------------------------------------------------------|--------------------------------------------------------------------------------------|-----------------------------------------------------------------------------------------------------------------------|-------|
|        |                                                                                             |                                                                                      | CaN with Ca <sup>2+</sup> .                                                                                           |       |
| Reac49 | $Ca^{2+} + CaM_{I,II}.CNA \xrightleftharpoons[k_b]{k_f} (Ca^{2+})_{II}.CaM_I.CNA$           | $k_f = 750 \mu\text{mol}^{-1}.\text{L}.\text{s}^{-1}$<br>$k_b = 950 \text{ s}^{-1}$  | Reversible<br>interaction of the<br>complex CaM<br>associated to the<br>subunit CNA of<br>CaN with Ca <sup>2+</sup> . | 32,46 |
| Reac50 | $Ca^{2+} + (Ca^{2+})_I.CaM_{II}.CNA \xrightleftharpoons[k_b]{k_f} (Ca^{2+})_{I,II}.CaM.CNA$ | $k_f = 750 \mu\text{mol}^{-1}.\text{L}.\text{s}^{-1}$<br>$k_b = 11.9 \text{ s}^{-1}$ | Reversible<br>interaction of the<br>complex CaM<br>associated to the<br>subunit CNA of<br>CaN with Ca <sup>2+</sup> . | 32,46 |
| Reac51 | $Ca^{2+} + (Ca^{2+})_{II}.CaM_I.CNA \xrightleftharpoons[k_b]{k_f} (Ca^{2+})_{I,II}.CaM.CNA$ | $k_f = 750 \mu\text{mol}^{-1}.\text{L}.\text{s}^{-1}$<br>$k_b = 11.9 \text{ s}^{-1}$ | Reversible<br>interaction of the                                                                                      | 32,46 |

|        |                                                                                         |                                                                                     |                                                                                                        |       |
|--------|-----------------------------------------------------------------------------------------|-------------------------------------------------------------------------------------|--------------------------------------------------------------------------------------------------------|-------|
|        |                                                                                         |                                                                                     | complex CaM associated to the subunit CNA of CaN with Ca <sup>2+</sup> .                               |       |
| Reac52 | $Ca^{2+} + CaM_{III,IV}.CNA \xrightleftharpoons[k_b]{k_f} (Ca^{2+})_{III}.CaM_{IV}.CNA$ | $k_f = 800 \mu\text{mol}^{-1}.\text{L}.\text{s}^{-1}$<br>$k_b = 160 \text{ s}^{-1}$ | Reversible interaction of the complex CaM associated to the subunit CNA of CaN with Ca <sup>2+</sup> . | 32,46 |
| Reac53 | $Ca^{2+} + CaM_{III,IV}.CNA \xrightleftharpoons[k_b]{k_f} (Ca^{2+})_{IV}.CaM_{III}.CNA$ | $k_f = 204 \mu\text{mol}^{-1}.\text{L}.\text{s}^{-1}$<br>$k_b = 48 \text{ s}^{-1}$  | Reversible interaction of the complex CaM associated to the subunit CNA of                             | 32,46 |

|        |                                                                                                   |                                                                                      |                                                                                                      |       |
|--------|---------------------------------------------------------------------------------------------------|--------------------------------------------------------------------------------------|------------------------------------------------------------------------------------------------------|-------|
|        |                                                                                                   |                                                                                      | CaN with Ca <sup>2+</sup> .                                                                          |       |
| Reac54 | $Ca^{2+} + (Ca^{2+})_{III}.CaM_{IV}.CNA \xrightleftharpoons[k_b]{k_f} (Ca^{2+})_{III,IV}.CaM.CNA$ | $k_f = 204 \mu\text{mol}^{-1}.\text{L}.\text{s}^{-1}$<br>$k_b = 0.24 \text{ s}^{-1}$ | Reversible interaction of the complex CaM associated to the subunit CNA of CaN with Ca <sup>2+</sup> | 32,46 |
| Reac55 | $Ca^{2+} + (Ca^{2+})_{IV}.CaM_{III}.CNA \xrightleftharpoons[k_b]{k_f} (Ca^{2+})_{III,IV}.CaM.CNA$ | $k_f = 800 \mu\text{mol}^{-1}.\text{L}.\text{s}^{-1}$<br>$k_b = 0.8 \text{ s}^{-1}$  | Reversible interaction of the complex CaM associated to the subunit CNA of CaN with Ca <sup>2+</sup> | 32,46 |
| Reac56 | $(Ca^{2+})_{I,II,III,IV}.CaM + AC \xrightleftharpoons[k_b]{k_f} (Ca^{2+})_{I,II,III,IV}.CaM.AC$   | $k_f = 0.2 \mu\text{mol}^{-1}.\text{L}.\text{s}^{-1}$<br>$k_b = 0.01 \text{ s}^{-1}$ | Binding and unbinding of AC                                                                          | 51,53 |

|        |                                                                                                                       |                                                                                                  |                                                                                                                       |       |
|--------|-----------------------------------------------------------------------------------------------------------------------|--------------------------------------------------------------------------------------------------|-----------------------------------------------------------------------------------------------------------------------|-------|
|        |                                                                                                                       |                                                                                                  | to CaM fully loaded with Ca <sup>2+</sup> .                                                                           |       |
| Reac57 | $(Ca^{2+})_{II,III,IV} \cdot CaM_I + AC \xrightleftharpoons[k_b]{k_f} (Ca^{2+})_{II,III,IV} \cdot CaM_I \cdot AC$     | $k_f = 0.2 \mu\text{mol}^{-1} \cdot \text{L} \cdot \text{s}^{-1}$<br>$k_b = 0.02 \text{ s}^{-1}$ | Binding and unbinding of AC to CaM with Ca <sup>2+</sup> bound to its Ca <sup>2+</sup> -binding sites II, III and IV. | 51,53 |
| Reac58 | $(Ca^{2+})_{I,II,IV} \cdot CaM_{III} + AC \xrightleftharpoons[k_b]{k_f} (Ca^{2+})_{I,II,IV} \cdot CaM_{III} \cdot AC$ | $k_f = 0.2 \mu\text{mol}^{-1} \cdot \text{L} \cdot \text{s}^{-1}$<br>$k_b = 0.05 \text{ s}^{-1}$ | Binding and unbinding of AC to CaM with Ca <sup>2+</sup> bound to its Ca <sup>2+</sup> -binding                       | 51,53 |



|        |                                                                                                     |                                                                                      |                                                                                                        |       |
|--------|-----------------------------------------------------------------------------------------------------|--------------------------------------------------------------------------------------|--------------------------------------------------------------------------------------------------------|-------|
|        |                                                                                                     |                                                                                      | sites I, II and IV.                                                                                    |       |
| Reac59 | $(Ca^{2+})_{I,III,IV}.CaM_{II} + AC \xrightleftharpoons[k_b]{k_f} (Ca^{2+})_{I,III,IV}.CaM_{II}.AC$ | $k_f = 0.2 \mu\text{mol}^{-1}.\text{L}.\text{s}^{-1}$<br>$k_b = 0.15 \text{ s}^{-1}$ | Binding and unbinding of AC to CaM with $Ca^{2+}$ bound to its $Ca^{2+}$ -binding sites I, III and IV. | 51,53 |
| Reac60 | $(Ca^{2+})_{I,II,III}.CaM_{IV} + AC \xrightleftharpoons[k_b]{k_f} (Ca^{2+})_{I,II,III}.CaM_{IV}.AC$ | $k_f = 0.2 \mu\text{mol}^{-1}.\text{L}.\text{s}^{-1}$<br>$k_b = 0.3 \text{ s}^{-1}$  | Binding and unbinding of AC to CaM with $Ca^{2+}$ bound to its $Ca^{2+}$ -binding sites I, II and III. | 51,53 |
| Reac61 | $(Ca^{2+})_{I,IV}.CaM_{II,III} + AC \xrightleftharpoons[k_b]{k_f} (Ca^{2+})_{I,IV}.CaM_{II,III}.AC$ | $k_f = 0.2 \mu\text{mol}^{-1}.\text{L}.\text{s}^{-1}$                                | Binding and                                                                                            | 51,53 |

|        |                                                                                                                                                                 |                                                                                                 |                                                                                                                                                    |       |
|--------|-----------------------------------------------------------------------------------------------------------------------------------------------------------------|-------------------------------------------------------------------------------------------------|----------------------------------------------------------------------------------------------------------------------------------------------------|-------|
|        |                                                                                                                                                                 | $k_b = 0.75 \text{ s}^{-1}$                                                                     | unbinding of AC<br>to CaM partially<br>loaded with $\text{Ca}^{2+}$<br>bound to its<br>$\text{Ca}^{2+}$ -binding<br>sites I and IV                 |       |
| Reac62 | $(\text{Ca}^{2+})_{I,II} \cdot \text{CaM}_{III,IV} + \text{AC} \xrightleftharpoons[k_b]{k_f} (\text{Ca}^{2+})_{I,II} \cdot \text{CaM}_{III,IV} \cdot \text{AC}$ | $k_f = 0.2 \mu\text{mol}^{-1} \cdot \text{L} \cdot \text{s}^{-1}$<br>$k_b = 1.5 \text{ s}^{-1}$ | Binding and<br>unbinding of AC<br>to CaM partially<br>loaded with $\text{Ca}^{2+}$<br>bound to its<br>$\text{Ca}^{2+}$ -binding<br>sites I and II. | 51,53 |
| Reac63 | $(\text{Ca}^{2+})_{I,III} \cdot \text{CaM}_{II,IV} + \text{AC} \xrightleftharpoons[k_b]{k_f} (\text{Ca}^{2+})_{I,III} \cdot \text{CaM}_{II,IV} \cdot \text{AC}$ | $k_f = 0.2 \mu\text{mol}^{-1} \cdot \text{L} \cdot \text{s}^{-1}$<br>$k_b = 4.5 \text{ s}^{-1}$ | Binding and<br>unbinding of AC                                                                                                                     | 51,53 |

|        |                                                                                                     |                                                                                                 |                                                                                                                                   |       |
|--------|-----------------------------------------------------------------------------------------------------|-------------------------------------------------------------------------------------------------|-----------------------------------------------------------------------------------------------------------------------------------|-------|
|        |                                                                                                     |                                                                                                 | to CaM partially loaded with Ca <sup>2+</sup> bound to its Ca <sup>2+</sup> -binding sites I and III.                             |       |
| Reac64 | $(Ca^{2+})_{II,IV}.CaM_{I,III} + AC \xrightleftharpoons[k_b]{k_f} (Ca^{2+})_{II,IV}.CaM_{I,III}.AC$ | $k_f = 0.2 \mu\text{mol}^{-1} \cdot \text{L} \cdot \text{s}^{-1}$<br>$k_b = 0.1 \text{ s}^{-1}$ | Binding and unbinding of AC to CaM partially loaded with Ca <sup>2+</sup> bound to its Ca <sup>2+</sup> -binding sites II and IV. | 51,53 |
| Reac65 | $(Ca^{2+})_{III,IV}.CaM_{I,II} + AC \xrightleftharpoons[k_b]{k_f} (Ca^{2+})_{III,IV}.CaM_{I,II}.AC$ | $k_f = 0.2 \mu\text{mol}^{-1} \cdot \text{L} \cdot \text{s}^{-1}$<br>$k_b = 0.3 \text{ s}^{-1}$ | Binding and unbinding of AC to CaM partially                                                                                      | 51,53 |

|        |                                                                                                     |                                                                                                 |                                                                                                                                                      |       |
|--------|-----------------------------------------------------------------------------------------------------|-------------------------------------------------------------------------------------------------|------------------------------------------------------------------------------------------------------------------------------------------------------|-------|
|        |                                                                                                     |                                                                                                 | loaded with Ca <sup>2+</sup><br>bound to its<br>Ca <sup>2+</sup> -binding<br>sites III and IV.                                                       |       |
| Reac66 | $(Ca^{2+})_{II,III}.CaM_{I,IV} + AC \xrightleftharpoons[k_b]{k_f} (Ca^{2+})_{II,III}.CaM_{I,IV}.AC$ | $k_f = 0.2 \mu\text{mol}^{-1} \cdot \text{L} \cdot \text{s}^{-1}$<br>$k_b = 0.6 \text{ s}^{-1}$ | Binding and<br>unbinding of AC<br>to CaM partially<br>loaded with Ca <sup>2+</sup><br>bound to its<br>Ca <sup>2+</sup> -binding<br>sites II and III. | 51,53 |
| Reac67 | $(Ca^{2+})_{III}.CaM_{I,II,IV} + AC \xrightleftharpoons[k_b]{k_f} (Ca^{2+})_{III}.CaM_{I,II,IV}.AC$ | $k_f = 0.2 \mu\text{mol}^{-1} \cdot \text{L} \cdot \text{s}^{-1}$<br>$k_b = 9 \text{ s}^{-1}$   | Binding and<br>unbinding of AC<br>to CaM partially<br>loaded with Ca <sup>2+</sup>                                                                   | 51,53 |

|        |                                                                                                     |                                                                                     |                                                                                                                                             |       |
|--------|-----------------------------------------------------------------------------------------------------|-------------------------------------------------------------------------------------|---------------------------------------------------------------------------------------------------------------------------------------------|-------|
|        |                                                                                                     |                                                                                     | bound to its<br>Ca <sup>2+</sup> -binding<br>site III.                                                                                      |       |
| Reac68 | $(Ca^{2+})_{II}.CaM_{I,III,IV} + AC \xrightleftharpoons[k_b]{k_f} (Ca^{2+})_{II}.CaM_{I,III,IV}.AC$ | $k_f = 0.2 \mu\text{mol}^{-1}.\text{L}.\text{s}^{-1}$<br>$k_b = 3 \text{ s}^{-1}$   | Binding and<br>unbinding of AC<br>to CaM partially<br>loaded with Ca <sup>2+</sup><br>bound to its<br>Ca <sup>2+</sup> -binding<br>site II. | 51,53 |
| Reac69 | $(Ca^{2+})_{IV}.CaM_{I,II,III} + AC \xrightleftharpoons[k_b]{k_f} (Ca^{2+})_{IV}.CaM_{I,II,III}.AC$ | $k_f = 0.2 \mu\text{mol}^{-1}.\text{L}.\text{s}^{-1}$<br>$k_b = 1.5 \text{ s}^{-1}$ | Binding and<br>unbinding of AC<br>to CaM partially<br>loaded with Ca <sup>2+</sup><br>bound to its                                          | 51,53 |

|        |                                                                                                                   |                                                                                                  |                                                                                                                          |       |
|--------|-------------------------------------------------------------------------------------------------------------------|--------------------------------------------------------------------------------------------------|--------------------------------------------------------------------------------------------------------------------------|-------|
|        |                                                                                                                   |                                                                                                  | Ca <sup>2+</sup> -binding site IV                                                                                        |       |
| Reac70 | $(Ca^{2+})_I \cdot CaM_{II,III,IV} + AC \xrightleftharpoons[k_b]{k_f} (Ca^{2+})_I \cdot CaM_{II,III,IV} \cdot AC$ | $k_f = 0.2 \mu\text{mol}^{-1} \cdot \text{L} \cdot \text{s}^{-1}$<br>$k_b = 22.5 \text{ s}^{-1}$ | Binding and unbinding of AC to CaM partially loaded with Ca <sup>2+</sup> bound to its Ca <sup>2+</sup> -binding site I. | 51,53 |
| Reac71 | $Ca^{2+} + (Ca^{2+})_I \cdot CaM_{II} \cdot AC \xrightleftharpoons[k_b]{k_f} (Ca^{2+})_{I,II} \cdot CaM \cdot AC$ | $k_f = 750 \mu\text{mol}^{-1} \cdot \text{L} \cdot \text{s}^{-1}$<br>$k_b = 1.25 \text{ s}^{-1}$ | Cooperative association and dissociation of Ca <sup>2+</sup> to CaM bound to AC. The presence or                         | 32,52 |

|        |                                                                                                                                                                                |                                                                                                    |                                                                                                                                               |       |
|--------|--------------------------------------------------------------------------------------------------------------------------------------------------------------------------------|----------------------------------------------------------------------------------------------------|-----------------------------------------------------------------------------------------------------------------------------------------------|-------|
|        |                                                                                                                                                                                |                                                                                                    | absence of $\text{Ca}^{2+}$ associated to the $\text{Ca}^{2+}$ -binding sites in the C-terminal of CaM does not interfere in these reactions. |       |
| Reac72 | $\text{Ca}^{2+} + (\text{Ca}^{2+})_{II} \cdot \text{CaM}_{I} \cdot \text{AC} \xrightleftharpoons[k_b]{k_f} (\text{Ca}^{2+})_{I,II} \cdot \text{CaM} \cdot \text{AC}$           | $k_f = 750 \mu\text{mol}^{-1} \cdot \text{L} \cdot \text{s}^{-1}$<br>$k_b = 156.25 \text{ s}^{-1}$ | Association and dissociation of $\text{Ca}^{2+}$ to CaM bound to AC.                                                                          | 32,52 |
| Reac73 | $\text{Ca}^{2+} + (\text{Ca}^{2+})_{N} \cdot \text{CaM}_{III,IV} \cdot \text{AC} \xrightleftharpoons[k_b]{k_f} (\text{Ca}^{2+})_{N,III} \cdot \text{CaM}_{IV} \cdot \text{AC}$ | $k_f = 800 \mu\text{mol}^{-1} \cdot \text{L} \cdot \text{s}^{-1}$<br>$k_b = 80 \text{ s}^{-1}$     | Association and dissociation of $\text{Ca}^{2+}$ to CaM                                                                                       | 32,52 |

|        |                                                                                                 |                                                                                                   |                                                                                                                  |       |
|--------|-------------------------------------------------------------------------------------------------|---------------------------------------------------------------------------------------------------|------------------------------------------------------------------------------------------------------------------|-------|
|        |                                                                                                 |                                                                                                   | bound to AC.<br>The term $(Ca^{2+})_N.CaM$ indicates that CaM is partially bound to $Ca^{2+}$ in its N-terminal. |       |
| Reac74 | $Ca^{2+} + (Ca^{2+})_N.CaM.AC \xrightleftharpoons[k_b]{k_f} (Ca^{2+})_{N,IV}.CaM.AC$            | $k_f = 204 \mu\text{mol}^{-1} \cdot \text{L} \cdot \text{s}^{-1}$<br>$k_b = 20.46 \text{ s}^{-1}$ | Association and dissociation of $Ca^{2+}$ to CaM bound to AC.                                                    | 32,52 |
| Reac75 | $Ca^{2+} + (Ca^{2+})_C.CaM_{I,II}.AC \xrightleftharpoons[k_b]{k_f} (Ca^{2+})_{I,C}.CaM_{II}.AC$ | $k_f = 750 \mu\text{mol}^{-1} \cdot \text{L} \cdot \text{s}^{-1}$<br>$k_b = 12500 \text{ s}^{-1}$ | Association and dissociation of $Ca^{2+}$ to CaM bound to AC.                                                    | 32,52 |



|        |                                                                                                                         |                                                                                                   |                                                                           |             |
|--------|-------------------------------------------------------------------------------------------------------------------------|---------------------------------------------------------------------------------------------------|---------------------------------------------------------------------------|-------------|
| Reac76 | $Ca^{2+} + (Ca^{2+})_C \cdot CaM_{I,II} \cdot AC \xrightleftharpoons[k_b]{k_f} (Ca^{2+})_{II,C} \cdot CaM_I \cdot AC$   | $k_f = 750 \mu\text{mol}^{-1} \cdot \text{L} \cdot \text{s}^{-1}$<br>$k_b = 100 \text{ s}^{-1}$   | Association and dissociation of $Ca^{2+}$ to CaM bound to AC.             | 32,52       |
| Reac77 | $Ca^{2+} + (Ca^{2+})_{III} \cdot CaM_{IV} \cdot AC \xrightleftharpoons[k_b]{k_f} (Ca^{2+})_{III,IV} \cdot CaM \cdot AC$ | $k_f = 204 \mu\text{mol}^{-1} \cdot \text{L} \cdot \text{s}^{-1}$<br>$k_b = 0.102 \text{ s}^{-1}$ | Cooperative association and dissociation of $Ca^{2+}$ to CaM bound to AC. | 32,52       |
| Reac78 | $Ca^{2+} + (Ca^{2+})_{IV} \cdot CaM_{III} \cdot AC \xrightleftharpoons[k_b]{k_f} (Ca^{2+})_{III,IV} \cdot CaM \cdot AC$ | $k_f = 800 \mu\text{mol}^{-1} \cdot \text{L} \cdot \text{s}^{-1}$<br>$k_b = 0.4 \text{ s}^{-1}$   | Cooperative association and dissociation of $Ca^{2+}$ to CaM bound to AC. | 32,52       |
| Reac79 | $Ca^{2+} + AC \xrightleftharpoons[k_b]{k_f} (Ca^{2+}) \cdot AC$                                                         | $k_f = 0.1 \mu\text{mol}^{-1} \cdot \text{L} \cdot \text{s}^{-1}$                                 | Inhibitory                                                                | This paper, |

|        |                                                                                                                                                           |                                                                                                |                                                                                                                                               |                              |
|--------|-----------------------------------------------------------------------------------------------------------------------------------------------------------|------------------------------------------------------------------------------------------------|-----------------------------------------------------------------------------------------------------------------------------------------------|------------------------------|
|        |                                                                                                                                                           | $k_b = 8 \text{ s}^{-1}$                                                                       | interaction of $\text{Ca}^{2+}$ to AC. These reactions occur with the same rate constants in the presence or absence of CaM associated to AC. | estimated from <sup>55</sup> |
| Reac80 | $(\text{Ca}^{2+})_N \cdot \text{CaM}_{III,IV} + \text{PDE1} \xrightleftharpoons[k_b]{k_f} (\text{Ca}^{2+})_N \cdot \text{CaM}_{III,IV} \cdot \text{PDE1}$ | $k_f = 1 \mu\text{mol}^{-1} \cdot \text{L} \cdot \text{s}^{-1}$<br>$k_b = 0.05 \text{ s}^{-1}$ | Interaction of PDE1 with CaM partially loaded with $\text{Ca}^{2+}$ bound to the $\text{Ca}^{2+}$                                             | <sup>57,59,61</sup>          |

|        |                                                                                           |                                                                                    |                                                                                                                      |          |
|--------|-------------------------------------------------------------------------------------------|------------------------------------------------------------------------------------|----------------------------------------------------------------------------------------------------------------------|----------|
|        |                                                                                           |                                                                                    | binding sites of its N-terminal.                                                                                     |          |
| Reac81 | $(Ca^{2+})_C.CaM_{I,II} + PDE1 \xrightleftharpoons[k_b]{k_f} (Ca^{2+})_C.CaM_{I,II}.PDE1$ | $k_f = 1 \mu\text{mol}^{-1}.\text{L}.\text{s}^{-1}$<br>$k_b = 0.1 \text{ s}^{-1}$  | Interaction of PDE1 with CaM partially loaded with $Ca^{2+}$ bound to the $Ca^{2+}$ binding sites of its C-terminal. | 57,59,61 |
| Reac82 | $(Ca^{2+})_{N,C}.CaM + PDE1 \xrightleftharpoons[k_b]{k_f} (Ca^{2+})_{N,C}.CaM.PDE1$       | $k_f = 1 \mu\text{mol}^{-1}.\text{L}.\text{s}^{-1}$<br>$k_b = 0.05 \text{ s}^{-1}$ | Interaction of PDE1 with CaM partially loaded with $Ca^{2+}$ bound to one of the $Ca^{2+}$ binding                   | 57,59,61 |

|        |                                                                                               |                                                                                    |                                                                                                                                                                      |          |
|--------|-----------------------------------------------------------------------------------------------|------------------------------------------------------------------------------------|----------------------------------------------------------------------------------------------------------------------------------------------------------------------|----------|
|        |                                                                                               |                                                                                    | sites of its C-terminal and one of its N-terminal.                                                                                                                   |          |
| Reac83 | $(Ca^{2+})_{N,III,IV}.CaM + PDE1 \xrightleftharpoons[k_b]{k_f} (Ca^{2+})_{N,III,IV}.CaM.PDE1$ | $k_f = 1 \mu\text{mol}^{-1}.\text{L}.\text{s}^{-1}$<br>$k_b = 0.01 \text{ s}^{-1}$ | Interaction of PDE1 with CaM partially loaded with $Ca^{2+}$ bound to the two $Ca^{2+}$ binding sites of its C-terminal and only one of the sites of its N-terminal. | 57,59,61 |
| Reac84 | $(Ca^{2+})_{I,II,C}.CaM + PDE1 \xrightleftharpoons[k_b]{k_f} (Ca^{2+})_{I,II,C}.CaM.PDE1$     | $k_f = 1 \mu\text{mol}^{-1}.\text{L}.\text{s}^{-1}$                                | Interaction of                                                                                                                                                       | 57,59,61 |

|  |  |                               |                                                                                                                                                                                                                                                            |  |
|--|--|-------------------------------|------------------------------------------------------------------------------------------------------------------------------------------------------------------------------------------------------------------------------------------------------------|--|
|  |  | $k_b = 0.0001 \text{ s}^{-1}$ | PDE1 with CaM partially loaded with $\text{Ca}^{2+}$ bound to the $\text{Ca}^{2+}$ binding sites of its C-terminal (one or two ions) and two of the sites of its N-terminal. The same rates were used for the interaction of PDE1 with CaM fully saturated |  |
|--|--|-------------------------------|------------------------------------------------------------------------------------------------------------------------------------------------------------------------------------------------------------------------------------------------------------|--|

|        |                                                                                                                                 |                                                                                                  |                                                                                                 |       |
|--------|---------------------------------------------------------------------------------------------------------------------------------|--------------------------------------------------------------------------------------------------|-------------------------------------------------------------------------------------------------|-------|
|        |                                                                                                                                 |                                                                                                  | with Ca <sup>2+</sup> .                                                                         |       |
| Reac85 | $Ca^{2+} + (Ca^{2+})_C \cdot CaM_{I,II} \cdot PDE1 \xrightleftharpoons[k_b]{k_f} (Ca^{2+})_{I,C} \cdot CaM_{II} \cdot PDE1$     | $k_f = 750 \mu\text{mol}^{-1} \cdot \text{L} \cdot \text{s}^{-1}$<br>$k_b = 2000 \text{ s}^{-1}$ | Binding of Ca <sup>2+</sup> to the Ca <sup>2+</sup> -binding site I of CaM associated to PDE1.  | 32,62 |
| Reac86 | $Ca^{2+} + (Ca^{2+})_C \cdot CaM_{I,II} \cdot PDE1 \xrightleftharpoons[k_b]{k_f} (Ca^{2+})_{II,C} \cdot CaM_I \cdot PDE1$       | $k_f = 750 \mu\text{mol}^{-1} \cdot \text{L} \cdot \text{s}^{-1}$<br>$k_b = 2000 \text{ s}^{-1}$ | Binding of Ca <sup>2+</sup> to the Ca <sup>2+</sup> -binding site II of CaM associated to PDE1. | 32,62 |
| Reac87 | $Ca^{2+} + (Ca^{2+})_N \cdot CaM_{III,IV} \cdot PDE1 \xrightleftharpoons[k_b]{k_f} (Ca^{2+})_{III,N} \cdot CaM_{IV} \cdot PDE1$ | $k_f = 800 \mu\text{mol}^{-1} \cdot \text{L} \cdot \text{s}^{-1}$<br>$k_b = 800 \text{ s}^{-1}$  | Binding of Ca <sup>2+</sup> to the Ca <sup>2+</sup> -binding site III of CaM                    | 32,62 |

|        |                                                                                                                                 |                                                                                                 |                                                                                               |       |
|--------|---------------------------------------------------------------------------------------------------------------------------------|-------------------------------------------------------------------------------------------------|-----------------------------------------------------------------------------------------------|-------|
|        |                                                                                                                                 |                                                                                                 | associated to PDE1.                                                                           |       |
| Reac88 | $Ca^{2+} + (Ca^{2+})_N \cdot CaM_{III,IV} \cdot PDE1 \xrightleftharpoons[k_b]{k_f} (Ca^{2+})_{IV,N} \cdot CaM_{III} \cdot PDE1$ | $k_f = 204 \mu\text{mol}^{-1} \cdot \text{L} \cdot \text{s}^{-1}$<br>$k_b = 204 \text{ s}^{-1}$ | Binding of $Ca^{2+}$ to the $Ca^{2+}$ -binding site IV of CaM associated to PDE1.             | 32,62 |
| Reac89 | $Ca^{2+} + (Ca^{2+})_I \cdot CaM_{II} \cdot PDE1 \xrightleftharpoons[k_b]{k_f} (Ca^{2+})_{I,II} \cdot CaM \cdot PDE1$           | $k_f = 750 \mu\text{mol}^{-1} \cdot \text{L} \cdot \text{s}^{-1}$<br>$k_b = 25 \text{ s}^{-1}$  | Cooperative binding of $Ca^{2+}$ to the $Ca^{2+}$ -binding site II of CaM associated to PDE1. | 32,62 |
| Reac90 | $Ca^{2+} + (Ca^{2+})_{II} \cdot CaM_I \cdot PDE1 \xrightleftharpoons[k_b]{k_f} (Ca^{2+})_{I,II} \cdot CaM \cdot PDE1$           | $k_f = 750 \mu\text{mol}^{-1} \cdot \text{L} \cdot \text{s}^{-1}$                               | Cooperative                                                                                   | 32,62 |

|        |                                                                                                                                                                              |                                                                                                  |                                                                                                              |       |
|--------|------------------------------------------------------------------------------------------------------------------------------------------------------------------------------|--------------------------------------------------------------------------------------------------|--------------------------------------------------------------------------------------------------------------|-------|
|        |                                                                                                                                                                              | $k_b = 25 \text{ s}^{-1}$                                                                        | binding of $\text{Ca}^{2+}$ to the $\text{Ca}^{2+}$ -binding site I of CaM associated to PDE1.               |       |
| Reac91 | $\text{Ca}^{2+} + (\text{Ca}^{2+})_{IV} \cdot \text{CaM}_{III} \cdot \text{PDE1} \xrightleftharpoons[k_b]{k_f} (\text{Ca}^{2+})_{III,IV} \cdot \text{CaM} \cdot \text{PDE1}$ | $k_f = 800 \mu\text{mol}^{-1} \cdot \text{L} \cdot \text{s}^{-1}$<br>$k_b = 4 \text{ s}^{-1}$    | Cooperative binding of $\text{Ca}^{2+}$ to the $\text{Ca}^{2+}$ -binding site III of CaM associated to PDE1. | 32,62 |
| Reac92 | $\text{Ca}^{2+} + (\text{Ca}^{2+})_{III} \cdot \text{CaM}_{IV} \cdot \text{PDE1} \xrightleftharpoons[k_b]{k_f} (\text{Ca}^{2+})_{III,IV} \cdot \text{CaM} \cdot \text{PDE1}$ | $k_f = 204 \mu\text{mol}^{-1} \cdot \text{L} \cdot \text{s}^{-1}$<br>$k_b = 1.02 \text{ s}^{-1}$ | Cooperative binding of $\text{Ca}^{2+}$ to the $\text{Ca}^{2+}$ -                                            | 32,62 |



|        |                                                                                                 |                                                                                                                                   |                                                                                                                                                             |                  |
|--------|-------------------------------------------------------------------------------------------------|-----------------------------------------------------------------------------------------------------------------------------------|-------------------------------------------------------------------------------------------------------------------------------------------------------------|------------------|
|        |                                                                                                 |                                                                                                                                   | binding site IV<br>of CaM<br>associated to<br>PDE1.                                                                                                         |                  |
| Reac93 | $AC \xrightleftharpoons[k_b]{[ATP] \times k_f} AC.ATP$ $AC.ATP \xrightarrow{k_{cat}} AC + cAMP$ | $k_f = 0.125 \mu\text{mol}^{-1} \cdot \text{L} \cdot \text{s}^{-1}$<br>$k_b = 40 \text{ s}^{-1}$<br>$k_{cat} = 10 \text{ s}^{-1}$ | [ATP] = 10<br>mmol.L <sup>-1</sup><br>Basal catalytic<br>rates of AC<br>estimated from<br>experimental<br>data obtained in<br>absence of Ca <sup>2+</sup> . | <sup>55</sup>    |
| Reac94 | $AC \xrightleftharpoons[k_b]{[ATP] \times k_f} AC.ATP$ $AC.ATP \xrightarrow{k_{cat}} AC + cAMP$ | $k_f = 1.25 \mu\text{mol}^{-1} \cdot \text{L} \cdot \text{s}^{-1}$<br>$k_b = 400 \text{ s}^{-1}$<br>$k_{cat} = 50 \text{ s}^{-1}$ | Conversion of<br>ATP to cAMP<br>catalyzed by AC                                                                                                             | <sup>51,55</sup> |

|        |                                                                                                                                                                                                                                                                                                                                                           |                                                                                                  |                                                                                                                                                                                                             |                  |
|--------|-----------------------------------------------------------------------------------------------------------------------------------------------------------------------------------------------------------------------------------------------------------------------------------------------------------------------------------------------------------|--------------------------------------------------------------------------------------------------|-------------------------------------------------------------------------------------------------------------------------------------------------------------------------------------------------------------|------------------|
|        |                                                                                                                                                                                                                                                                                                                                                           |                                                                                                  | bound to CaM with less than four $\text{Ca}^{2+}$ associated to its structure. The rate constants were based on experimental reports that indicates that $\text{Ca}^{2+}$ stimulates AC catalytic activity. |                  |
| Reac95 | $(\text{Ca}^{2+})_{N,C} \cdot \text{CaM} \cdot \text{AC} \xrightleftharpoons[k_b]{\text{ATP} \times k_f} (\text{Ca}^{2+})_{N,C} \cdot \text{CaM} \cdot \text{AC} \cdot \text{ATP}$ $(\text{Ca}^{2+})_{N,C} \cdot \text{CaM} \cdot \text{AC} \cdot \text{ATP} \xrightarrow{k_{cat}} (\text{Ca}^{2+})_{N,C} \cdot \text{CaM} \cdot \text{AC} + \text{cAMP}$ | $k_f = 1.25 \mu\text{mol}^{-1} \cdot \text{L} \cdot \text{s}^{-1}$<br>$k_b = 400 \text{ s}^{-1}$ | [ATP] = 10 mmol.L <sup>-1</sup>                                                                                                                                                                             | <sup>51,55</sup> |

|  |  |                                        |                                                                                                                                                                                                                             |  |
|--|--|----------------------------------------|-----------------------------------------------------------------------------------------------------------------------------------------------------------------------------------------------------------------------------|--|
|  |  | $k_{\text{cat}} = 1000 \text{ s}^{-1}$ | Conversion of ATP to cAMP catalyzed by AC bound to CaM fully saturated with $\text{Ca}^{2+}$ . The rate constants were based on experimental reports that indicates that $\text{Ca}^{2+}$ stimulates AC catalytic activity. |  |
|--|--|----------------------------------------|-----------------------------------------------------------------------------------------------------------------------------------------------------------------------------------------------------------------------------|--|

|        |                                                                                                                                                                              |                                                                                                                      |                                                                                                                                          |                                 |
|--------|------------------------------------------------------------------------------------------------------------------------------------------------------------------------------|----------------------------------------------------------------------------------------------------------------------|------------------------------------------------------------------------------------------------------------------------------------------|---------------------------------|
| Reac96 | $(Ca^{2+})_{N,C}.CaM.PDE1 + cAMP \xrightleftharpoons[k_b]{k_f} (Ca^{2+})_{N,C}.CaM.PDE1.cAMP$ $(Ca^{2+})_{N,C}.CaM.PDE1.cAMP \xrightarrow{k_{cat}} (Ca^{2+})_{N,C}.CaM.PDE1$ | $k_f = 33 \mu\text{mol}^{-1}.\text{L}.\text{s}^{-1}$<br>$k_b = 800 \text{ s}^{-1}$<br>$k_{cat} = 200 \text{ s}^{-1}$ | Rate constants for the degradation of cAMP catalyzed by PDE1.                                                                            | Estimated from <sup>57,68</sup> |
| Reac97 | $cAMP \xrightarrow{k_{cat}}$                                                                                                                                                 | $k_{cat} = 200 \text{ s}^{-1}$                                                                                       | Constant rate of cAMP degradation implemented to counteract AC basal activity. The parameter were set to sustain the basal [cAMP] around | This paper                      |

|        |                                                          |                                                                                                             |                                                                                                                                  |               |
|--------|----------------------------------------------------------|-------------------------------------------------------------------------------------------------------------|----------------------------------------------------------------------------------------------------------------------------------|---------------|
|        |                                                          |                                                                                                             | 100 nmol.L <sup>-1</sup>                                                                                                         |               |
| Reac98 | $C + RII\beta \xrightleftharpoons[k_b]{k_f} (RII\beta)C$ | $k_f = 2.1 \mu\text{mol}^{-1} \cdot \text{L} \cdot \text{s}^{-1}$<br>$k_b = 3 \cdot 10^{-4} \text{ s}^{-1}$ | Interaction between the subunits C and RII $\beta$ in absence of cAMP                                                            | <sup>8</sup>  |
| Reac99 | $(RII\beta)C \xrightarrow{k_{cat}} (RII\beta^P)C$        | $k_{cat} = 17.9 \text{ s}^{-1}$                                                                             | Autophosphorylation of PKA. This reaction occurs with the same rate independently of the presence of cAMP bound to RII $\beta$ . | <sup>10</sup> |

|         |                                                                                |                                                                                                                 |                                                                                                                           |    |
|---------|--------------------------------------------------------------------------------|-----------------------------------------------------------------------------------------------------------------|---------------------------------------------------------------------------------------------------------------------------|----|
| Reac100 | $C + RII\beta^P \xrightleftharpoons[k_b]{k_f} (RII\beta^P)C$                   | $k_f = 0.038 \mu\text{mol}^{-1} \cdot \text{L} \cdot \text{s}^{-1}$<br>$k_b = 2.6 \cdot 10^{-4} \text{ s}^{-1}$ | Interaction between the subunits C and phosphorylated RII $\beta$ (RII $\beta^P$ ) in absence of cAMP                     | 10 |
| Reac101 | $cAMP + RII\beta_{CNB-A} \xrightleftharpoons[k_b]{k_f} (cAMP)RII\beta_{CNB-A}$ | $k_f = 0.04 \mu\text{mol}^{-1} \cdot \text{L} \cdot \text{s}^{-1}$<br>$k_b = 0.013 \text{ s}^{-1}$              | Interaction between cAMP and the CNB-A domain of a RII $\beta$ subunit in the isolated (RII $\beta$ ) <sub>2</sub> dimer. | 74 |
| Reac102 | $cAMP + RII\beta_{CNB-B} \xrightleftharpoons[k_b]{k_f} (cAMP)RII\beta_{CNB-B}$ | $k_f = 0.015 \mu\text{mol}^{-1} \cdot \text{L} \cdot \text{s}^{-1}$                                             | Interaction                                                                                                               | 74 |

|         |                                                                                                       |                                                                                                   |                                                                                                               |       |
|---------|-------------------------------------------------------------------------------------------------------|---------------------------------------------------------------------------------------------------|---------------------------------------------------------------------------------------------------------------|-------|
|         |                                                                                                       | $k_b = 0.0016 \text{ s}^{-1}$                                                                     | between cAMP and the CNB-B domain of a RII $\beta$ subunit in the isolated (RII $\beta$ ) <sub>2</sub> dimer. |       |
| Reac103 | $cAMP + (RII\beta_{CNB-A})_2 C_2 \xrightleftharpoons[k_b]{k_f} (cAMP) \cdot (RII\beta_{CNB-A})_2 C_2$ | $k_f = 0.35 \mu\text{mol}^{-1} \cdot \text{L} \cdot \text{s}^{-1}$<br>$k_b = 0.33 \text{ s}^{-1}$ | Interaction between cAMP and the CNB-B domain of the PKA holoenzyme. Based on experimental data, we           | 74,75 |

|         |                                                                                                         |                                                                                                    |                                                                                                                                                                      |                  |
|---------|---------------------------------------------------------------------------------------------------------|----------------------------------------------------------------------------------------------------|----------------------------------------------------------------------------------------------------------------------------------------------------------------------|------------------|
|         |                                                                                                         |                                                                                                    | assumed that the affinities of cAMP for the CNB domains of the tetrameric PKA are smaller than the affinities observed for the isolated R subunits <sup>7,76</sup> . |                  |
| Reac104 | $cAMP + (RII \beta_{CNB-B})_2 C_2 \xrightleftharpoons[k_b]{k_f} (cAMP) \cdot (RII \beta_{CNB-B})_2 C_2$ | $k_f = 0.35 \mu\text{mol}^{-1} \cdot \text{L} \cdot \text{s}^{-1}$<br>$k_b = 0.105 \text{ s}^{-1}$ | Interaction between cAMP and the CNB-B domain of the                                                                                                                 | <sup>74,75</sup> |



|  |  |  |                                                                                                                                                                                                        |  |
|--|--|--|--------------------------------------------------------------------------------------------------------------------------------------------------------------------------------------------------------|--|
|  |  |  | <p>PKA holoenzyme.</p> <p>Based on experimental data, we assumed that the affinities of cAMP for the CNB domains of the tetrameric PKA are smaller than the affinities observed for the isolated R</p> |  |
|--|--|--|--------------------------------------------------------------------------------------------------------------------------------------------------------------------------------------------------------|--|

|         |                                                                                                                 |                                                                                                                                                                                                                    |                                                                                                                                                                                          |                |
|---------|-----------------------------------------------------------------------------------------------------------------|--------------------------------------------------------------------------------------------------------------------------------------------------------------------------------------------------------------------|------------------------------------------------------------------------------------------------------------------------------------------------------------------------------------------|----------------|
|         |                                                                                                                 |                                                                                                                                                                                                                    | subunits <sup>7,76</sup> .                                                                                                                                                               |                |
| Reac105 | $(cAMP)_4 (RII \beta_{CNB-A2,B2})_2 C_2 \xrightleftharpoons[k_b]{k_f} (cAMP)_4 (RII \beta_{CNB-A2,B2})_2 C + C$ | $k_f = 4.2 \mu\text{mol}^{-1} \cdot \text{L} \cdot \text{s}^{-1}$<br>$k_b = 0.009 \text{ s}^{-1}$<br>$k_{f(P)} = 0.076 \mu\text{mol}^{-1} \cdot \text{L} \cdot \text{s}^{-1}$<br>$k_{(P)} = 0.0078 \text{ s}^{-1}$ | Dissociation and association of a single C subunit from the tetrameric PKA full saturated with cAMP. The term CNB-A2,B2 refers to the CNB fully saturated with cAMP. The term (P) in the | <sup>7,8</sup> |

|         |                                                                                                             |                                                                                                                                                                                                                |                                                                                                                                            |     |
|---------|-------------------------------------------------------------------------------------------------------------|----------------------------------------------------------------------------------------------------------------------------------------------------------------------------------------------------------------|--------------------------------------------------------------------------------------------------------------------------------------------|-----|
|         |                                                                                                             |                                                                                                                                                                                                                | parameters<br>indicates the rate constants for the phosphorylated PKA.                                                                     |     |
| Reac106 | $(cAMP)_4 (RII \beta_{CNB-A2,B2})_2 C \xrightleftharpoons[k_b]{k_f} (cAMP)_4 (RII \beta_{CNB-A2,B2})_2 + C$ | $k_f = 4.2 \mu\text{mol}^{-1} \cdot \text{L} \cdot \text{s}^{-1}$<br>$k_b = 0.9 \text{ s}^{-1}$<br>$k_{f(P)} = 0.076 \mu\text{mol}^{-1} \cdot \text{L} \cdot \text{s}^{-1}$<br>$k_{(P)} = 0.78 \text{ s}^{-1}$ | Cooperative dissociation and association of the second C subunit from the tetramer fully saturated with cAMP. The original parameters were | 7,8 |

|         |                                                                                                                 |                                                                                                                                                                                                                    |                                                                                                                                   |     |
|---------|-----------------------------------------------------------------------------------------------------------------|--------------------------------------------------------------------------------------------------------------------------------------------------------------------------------------------------------------------|-----------------------------------------------------------------------------------------------------------------------------------|-----|
|         |                                                                                                                 |                                                                                                                                                                                                                    | altered to capture the cooperativity of PKA activation. See text for details.                                                     |     |
| Reac107 | $(cAMP)_3 (RII \beta_{CNB-A2,B1})_2 C_2 \xrightleftharpoons[k_b]{k_f} (cAMP)_3 (RII \beta_{CNB-A2,B1})_2 C + C$ | $k_f = 4.2 \mu\text{mol}^{-1} \cdot \text{L} \cdot \text{s}^{-1}$<br>$k_b = 0.012 \text{ s}^{-1}$<br>$k_{f(P)} = 0.076 \mu\text{mol}^{-1} \cdot \text{L} \cdot \text{s}^{-1}$<br>$k_{(P)} = 0.0104 \text{ s}^{-1}$ | Dissociation of the first C subunit from the tetrameric PKA with two cAMP bound to the CNB-A domains and one cAMP associated to a | 7,8 |

|         |                                                                                                                 |                                                                                                                                                                                                                    |                                                                                                                                                   |     |
|---------|-----------------------------------------------------------------------------------------------------------------|--------------------------------------------------------------------------------------------------------------------------------------------------------------------------------------------------------------------|---------------------------------------------------------------------------------------------------------------------------------------------------|-----|
|         |                                                                                                                 |                                                                                                                                                                                                                    | CNB-B domain.                                                                                                                                     |     |
| Reac108 | $(cAMP)_3 (RII \beta_{CNB-A2,B1})_2 C \xrightleftharpoons[k_b]{k_f} (cAMP)_3 (RII \beta_{CNB-A2,B1})_2 + C$     | $k_f = 4.2 \mu\text{mol}^{-1} \cdot \text{L} \cdot \text{s}^{-1}$<br>$k_b = 0.012 \text{ s}^{-1}$<br>$k_{f(P)} = 0.076 \mu\text{mol}^{-1} \cdot \text{L} \cdot \text{s}^{-1}$<br>$k_{(P)} = 0.0104 \text{ s}^{-1}$ | Dissociation and association of the second C subunit from PKA with two cAMP bound to the CNB-A domains and one cAMP associated to a CNB-B domain. | 7,8 |
| Reac109 | $(cAMP)_3 (RII \beta_{CNB-A1,B2})_2 C_2 \xrightleftharpoons[k_b]{k_f} (cAMP)_3 (RII \beta_{CNB-A1,B2})_2 C + C$ | $k_f = 4.2 \mu\text{mol}^{-1} \cdot \text{L} \cdot \text{s}^{-1}$<br>$k_b = 1.2 \cdot 10^{-5} \text{ s}^{-1}$<br>$k_{f(P)} = 0.076 \mu\text{mol}^{-1} \cdot \text{L} \cdot \text{s}^{-1}$                          | Dissociation and association of the C subunit                                                                                                     | 7,8 |

|         |                                                                                                           |                                                                                                                                                                                                                                            |                                                                                                                |     |
|---------|-----------------------------------------------------------------------------------------------------------|--------------------------------------------------------------------------------------------------------------------------------------------------------------------------------------------------------------------------------------------|----------------------------------------------------------------------------------------------------------------|-----|
|         |                                                                                                           | $k_{(P)} = 1.04 \cdot 10^{-5} \text{ s}^{-1}$                                                                                                                                                                                              | from PKA with two cAMP bound to the CNB-B domains and one cAMP associated to a CNB-A domain.                   |     |
| Reac110 | $(cAMP)_3 (RII \beta_{CNB-A1,B2})_2 \xrightleftharpoons[k_b]{k_f} (cAMP)_3 (RII \beta_{CNB-A1,B2})_2 + C$ | $k_f = 4.2 \mu\text{mol}^{-1} \cdot \text{L} \cdot \text{s}^{-1}$<br>$k_b = 1.2 \cdot 10^{-5} \text{ s}^{-1}$<br>$k_{f(P)} = 0.076 \mu\text{mol}^{-1} \cdot \text{L} \cdot \text{s}^{-1}$<br>$k_{(P)} = 1.04 \cdot 10^{-5} \text{ s}^{-1}$ | Dissociation and association of the second C subunit from PKA with two cAMP bound to the CNB-B domains and one | 7,8 |

|         |                                                                                                               |                                                                                                                                                                                                                    |                                                                                                                       |     |
|---------|---------------------------------------------------------------------------------------------------------------|--------------------------------------------------------------------------------------------------------------------------------------------------------------------------------------------------------------------|-----------------------------------------------------------------------------------------------------------------------|-----|
|         |                                                                                                               |                                                                                                                                                                                                                    | cAMP associated to a CNB-A domain.                                                                                    |     |
| Reac111 | $(cAMP)_2 (RII \beta_{CNB-A2,B})_2 C_2 \xrightleftharpoons[k_b]{k_f} (cAMP)_2 (RII \beta_{CNB-A2,B})_2 C + C$ | $k_f = 4.2 \mu\text{mol}^{-1} \cdot \text{L} \cdot \text{s}^{-1}$<br>$k_b = 0.012 \text{ s}^{-1}$<br>$k_{f(P)} = 0.076 \mu\text{mol}^{-1} \cdot \text{L} \cdot \text{s}^{-1}$<br>$k_{(P)} = 0.0104 \text{ s}^{-1}$ | Dissociation and association of the first C subunit from the tetrameric PKA with two cAMP bound to the CNB-A domains. | 7,8 |
| Reac112 | $(cAMP)_2 (RII \beta_{CNB-A2,B})_2 C \xrightleftharpoons[k_b]{k_f} (cAMP)_2 (RII \beta_{CNB-A2,B})_2 + C$     | $k_f = 4.2 \mu\text{mol}^{-1} \cdot \text{L} \cdot \text{s}^{-1}$<br>$k_b = 0.012 \text{ s}^{-1}$<br>$k_{f(P)} = 0.076 \mu\text{mol}^{-1} \cdot \text{L} \cdot \text{s}^{-1}$                                      | Dissociation and association of the second C                                                                          | 7,8 |

|         |                                                                                                               |                                                                                                                                                                                                                                            |                                                                                               |     |
|---------|---------------------------------------------------------------------------------------------------------------|--------------------------------------------------------------------------------------------------------------------------------------------------------------------------------------------------------------------------------------------|-----------------------------------------------------------------------------------------------|-----|
|         |                                                                                                               | $k_{(P)} = 0.0104 \text{ s}^{-1}$                                                                                                                                                                                                          | subunit from PKA with two cAMP bound to the CNB-A domains.                                    |     |
| Reac113 | $(cAMP)_2 (RII \beta_{CNB-A,B2})_2 C_2 \xrightleftharpoons[k_b]{k_f} (cAMP)_2 (RII \beta_{CNB-A,B2})_2 C + C$ | $k_f = 4.2 \mu\text{mol}^{-1} \cdot \text{L} \cdot \text{s}^{-1}$<br>$k_b = 1.2 \cdot 10^{-5} \text{ s}^{-1}$<br>$k_{f(P)} = 0.076 \mu\text{mol}^{-1} \cdot \text{L} \cdot \text{s}^{-1}$<br>$k_{(P)} = 1.04 \cdot 10^{-5} \text{ s}^{-1}$ | Dissociation of a C subunit from the tetrameric PKA with two cAMP bound to the CNB-B domains. | 7,8 |
| Reac114 | $(cAMP)_2 (RII \beta_{CNB-A,B2})_2 C \xrightleftharpoons[k_b]{k_f} (cAMP)_2 (RII \beta_{CNB-A,B2})_2 + C$     | $k_f = 4.2 \mu\text{mol}^{-1} \cdot \text{L} \cdot \text{s}^{-1}$<br>$k_b = 1.2 \cdot 10^{-5} \text{ s}^{-1}$<br>$k_{f(P)} = 0.076 \mu\text{mol}^{-1} \cdot \text{L} \cdot \text{s}^{-1}$                                                  | Dissociation and association of the second C                                                  | 7,8 |



|         |                                                                                                                 |                                                                                                                                                                                                                                          |                                                                                                                                |     |
|---------|-----------------------------------------------------------------------------------------------------------------|------------------------------------------------------------------------------------------------------------------------------------------------------------------------------------------------------------------------------------------|--------------------------------------------------------------------------------------------------------------------------------|-----|
|         |                                                                                                                 | $k_{(P)} = 1.04 \cdot 10^{-5} \text{ s}^{-1}$                                                                                                                                                                                            | subunit from the tetrameric PKA with two cAMP bound to the CNB-B domains.                                                      |     |
| Reac115 | $(cAMP)_2 (RII \beta_{CNB-A1,B1})_2 C_2 \xrightleftharpoons[k_b]{k_f} (cAMP)_2 (RII \beta_{CNB-A1,B1})_2 C + C$ | $k_f = 2.1 \mu\text{mol}^{-1} \cdot \text{L} \cdot \text{s}^{-1}$<br>$k_b = 3 \cdot 10^{-4} \text{ s}^{-1}$<br>$k_{f(P)} = 0.038 \mu\text{mol}^{-1} \cdot \text{L} \cdot \text{s}^{-1}$<br>$k_{b(P)} = 2.6 \cdot 10^{-4} \text{ s}^{-1}$ | Dissociation and association of a C subunit from the tetrameric PKA with one cAMP bound to one CNB-B domain and another to one | 7,8 |

|         |                                                                                                               |                                                                                                                                                                                                                                          |                                                                                                                                        |     |
|---------|---------------------------------------------------------------------------------------------------------------|------------------------------------------------------------------------------------------------------------------------------------------------------------------------------------------------------------------------------------------|----------------------------------------------------------------------------------------------------------------------------------------|-----|
|         |                                                                                                               |                                                                                                                                                                                                                                          | CNB-A domain.                                                                                                                          |     |
| Reac116 | $(cAMP)_2 (RII \beta_{CNB-A1,B1})_2 C \xrightleftharpoons[k_b]{k_f} (cAMP)_2 (RII \beta_{CNB-A1,B1})_2 + C$   | $k_f = 2.1 \mu\text{mol}^{-1} \cdot \text{L} \cdot \text{s}^{-1}$<br>$k_b = 3 \cdot 10^{-4} \text{ s}^{-1}$<br>$k_{f(P)} = 0.038 \mu\text{mol}^{-1} \cdot \text{L} \cdot \text{s}^{-1}$<br>$k_{b(P)} = 2.6 \cdot 10^{-4} \text{ s}^{-1}$ | Dissociation and association of the second C subunit from PKA with one cAMP bound to one CNB-B domain and another to one CNB-A domain. | 7,8 |
| Reac117 | $(cAMP)_1 (RII \beta_{CNB-A1,B})_2 C_2 \xrightleftharpoons[k_b]{k_f} (cAMP)_1 (RII \beta_{CNB-A1,B})_2 C + C$ | $k_f = 2.1 \mu\text{mol}^{-1} \cdot \text{L} \cdot \text{s}^{-1}$<br>$k_b = 3 \cdot 10^{-4} \text{ s}^{-1}$<br>$k_{f(P)} = 0.038 \mu\text{mol}^{-1} \cdot \text{L} \cdot \text{s}^{-1}$<br>$k_{b(P)} = 2.6 \cdot 10^{-4} \text{ s}^{-1}$ | Dissociation and association of a C subunit from the tetrameric                                                                        | 7,8 |

|         |                                                                                                               |                                                                                                                                                                                                                                          |                                                                                                         |     |
|---------|---------------------------------------------------------------------------------------------------------------|------------------------------------------------------------------------------------------------------------------------------------------------------------------------------------------------------------------------------------------|---------------------------------------------------------------------------------------------------------|-----|
|         |                                                                                                               |                                                                                                                                                                                                                                          | PKA with one cAMP bound to the CNB-A domains.                                                           |     |
| Reac118 | $(cAMP)_1 (RII \beta_{CNB-A1,B})_2 C \xrightleftharpoons[k_b]{k_f} (cAMP)_1 (RII \beta_{CNB-A1,B})_2 + C$     | $k_f = 2.1 \mu\text{mol}^{-1} \cdot \text{L} \cdot \text{s}^{-1}$<br>$k_b = 3 \cdot 10^{-4} \text{ s}^{-1}$<br>$k_{f(P)} = 0.038 \mu\text{mol}^{-1} \cdot \text{L} \cdot \text{s}^{-1}$<br>$k_{b(P)} = 2.6 \cdot 10^{-4} \text{ s}^{-1}$ | Dissociation and association of the second C subunit from PKA with two cAMP bound to the CNB-A domains. | 7,8 |
| Reac119 | $(cAMP)_1 (RII \beta_{CNB-A,B1})_2 C_2 \xrightleftharpoons[k_b]{k_f} (cAMP)_1 (RII \beta_{CNB-A,B1})_2 C + C$ | $k_f = 2.1 \mu\text{mol}^{-1} \cdot \text{L} \cdot \text{s}^{-1}$<br>$k_b = 3 \cdot 10^{-4} \text{ s}^{-1}$<br>$k_{f(P)} = 0.038 \mu\text{mol}^{-1} \cdot \text{L} \cdot \text{s}^{-1}$                                                  | Dissociation and association of a C subunit from                                                        | 7,8 |

|     |                                                                                                              |                                                                                                                                                                                                                                          |                                                                                                         |       |
|-----|--------------------------------------------------------------------------------------------------------------|------------------------------------------------------------------------------------------------------------------------------------------------------------------------------------------------------------------------------------------|---------------------------------------------------------------------------------------------------------|-------|
|     |                                                                                                              | $k_{b(P)} = 2.6 \cdot 10^{-4} \text{ s}^{-1}$                                                                                                                                                                                            | the tetrameric PKA with one cAMP bound to the CNB-B domains.                                            |       |
| 120 | $(cAMP)_1 (RII \beta_{CNB-A,B1})_2 C \xrightleftharpoons[k_b]{k_f} (cAMP)_1 (RII \beta_{CNB-A,B1})_2 + C$    | $k_f = 2.1 \mu\text{mol}^{-1} \cdot \text{L} \cdot \text{s}^{-1}$<br>$k_b = 3 \cdot 10^{-4} \text{ s}^{-1}$<br>$k_{f(P)} = 0.038 \mu\text{mol}^{-1} \cdot \text{L} \cdot \text{s}^{-1}$<br>$k_{b(P)} = 2.6 \cdot 10^{-4} \text{ s}^{-1}$ | Dissociation and association of the second C subunit from PKA with one cAMP bound to the CNB-B domains. | 7,8   |
| 121 | $C + Kemptide \xrightleftharpoons[k_b]{k_f} C.Kemptide$<br>$C.Kemptide \xrightarrow{k_{cat}} C + Kemptide_P$ | $k_f = 1.29 \mu\text{mol}^{-1} \cdot \text{L} \cdot \text{s}^{-1}$<br>$k_b = 350 \text{ s}^{-1}$                                                                                                                                         | Rate constants for the                                                                                  | 82-84 |

|  |  |                             |                                                                                                                                                                                                             |  |
|--|--|-----------------------------|-------------------------------------------------------------------------------------------------------------------------------------------------------------------------------------------------------------|--|
|  |  | $k_b = 33.1 \text{ s}^{-1}$ | phosphorylation<br>of Kemptide<br>catalyzed by the<br>free subunit C of<br>PKA. The same<br>rate constants<br>were used in the<br>phosphorylation<br>and<br>dephosphorylati<br>on of subs by<br>PKA and CaN |  |
|--|--|-----------------------------|-------------------------------------------------------------------------------------------------------------------------------------------------------------------------------------------------------------|--|
